# Supplementary material for: Reciprocal interactions between alveolar progenitor dysfunction and aging promote lung fibrosis
Source: eLife. 2023 Jun 14;12:e85415. doi: 10.7554/eLife.85415 (PMC10292844; doi:10.7554/eLife.85415)
Supplement: Supplementary file 1. — (a) Ingenuity pathway analysis showing activation Z-scores for selected pathways in AEC2-2 compared to AEC2-1. (b) Ingenuity pathway analysis showing activation Z-scores for selected pathways in AEC2-3 compared to AEC2-1. [file elife-85415-supp1.xlsx]

## Sheet: Sheet0
© 2000-2020 QIAGEN. All rights reserved.
Ingenuity Canonical Pathways	-log(p-value)	Ratio	z-score	Molecules
Oxidative Phosphorylation	46	0.587	5.5	ATP5F1A,ATP5F1B,ATP5F1C,ATP5F1D,ATP5MC1,ATP5MC2,ATP5MC3,ATP5MF,ATP5MG,ATP5PB,ATP5PF,ATP5PO,COX17,COX4I1,COX5A,COX6A1,COX6A2,COX6B1,COX6B2,Cox6c,COX7A2,COX7B,COX8A,CYB5A,CYC1,CYCS,MT-CO1,MT-CO2,MT-CO3,MT-ND1,MT-ND2,MT-ND3,MT-ND4,MT-ND4L,MT-ND5,NDUFA11,NDUFA12,NDUFA13,NDUFA2,NDUFA3,NDUFA4,NDUFA5,NDUFA8,NDUFA9,NDUFAB1,NDUFB4,NDUFB6,NDUFB7,NDUFB8,NDUFB9,NDUFS3,NDUFS4,NDUFS6,NDUFS8,NDUFV2,SDHB,SDHD,UQ…
Mitochondrial Dysfunction	44	0.45	#NUM!	ATP5F1A,ATP5F1B,ATP5F1C,ATP5F1D,ATP5MC1,ATP5MC2,ATP5MC3,ATP5MF,ATP5MG,ATP5PB,ATP5PF,ATP5PO,CAT,COX17,COX4I1,COX5A,COX6A1,COX6A2,COX6B1,COX6B2,Cox6c,COX7A2,COX7B,COX8A,CYB5A,CYC1,CYCS,GPX4,GSR,LRRK2,MT-CO1,MT-CO2,MT-CO3,MT-ND1,MT-ND2,MT-ND3,MT-ND4,MT-ND4L,MT-ND5,NDUFA11,NDUFA12,NDUFA13,NDUFA2,NDUFA3,NDUFA4,NDUFA5,NDUFA8,NDUFA9,NDUFAB1,NDUFB4,NDUFB6,NDUFB7,NDUFB8,NDUFB9,NDUFS3,NDUFS4,NDUFS6,NDUFS8,…
EIF2 Signaling	34	0.344	5.754	ACTB,ATF3,CCND1,EIF1AX,EIF1AY,EIF2S1,EIF2S2,EIF3B,EIF3C,EIF3D,EIF3E,EIF3F,EIF3G,EIF3H,EIF3I,EIF3K,EIF3L,EIF3M,EIF4A1,EIF4A3,EIF4E,EIF4G2,EIF5,EIF5B,HRAS,PABPC1,PPP1CA,PPP1CB,Ppp1cc,PPP1R15A,RALA,RAP1A,RAP1B,RPL10A,RPL11,RPL12,RPL13,RPL13A,RPL15,RPL17,RPL18,RPL18A,RPL19,RPL23,RPL24,RPL27,RPL27A,RPL28,RPL3,RPL39,RPL4,RPL6,RPL7,RPL7A,RPL9,RPLP0,RPS10,RPS11,RPS13,RPS16,RPS17,RPS18,RPS19,RPS2,RPS20,RP…
Protein Ubiquitination Pathway	29.8	0.293	#NUM!	ANAPC11,B2M,BIRC6,CDC34,CRYAB,DNAJB1,DNAJB11,DNAJB6,DNAJC5,DNAJC8,DNAJC9,ELOC,HLA-A,HLA-E,HSP90AA1,HSP90AB1,HSPA1A/HSPA1B,HSPA4,HSPA8,HSPB1,HSPB8,HSPD1,MDM2,PSMA1,PSMA2,PSMA3,PSMA4,PSMA5,PSMA6,PSMA7,PSMB1,PSMB10,PSMB2,PSMB3,PSMB4,PSMB5,PSMB6,PSMB7,PSMB8,PSMB9,PSMC1,PSMC2,PSMC3,PSMC4,PSMC5,PSMC6,PSMD1,PSMD11,PSMD12,PSMD13,PSMD14,PSMD2,PSMD3,PSMD4,PSMD6,PSMD7,PSMD8,PSME1,PSME2,SKP1,STUB1,SUGT1,TAP1…
Sirtuin Signaling Pathway	25.5	0.265	-0.137	ACADL,ACLY,ATG3,ATP5F1A,ATP5F1B,ATP5F1C,ATP5F1D,ATP5MC1,ATP5PB,ATP5PF,BAX,CYC1,DUSP6,EPAS1,GABARAPL2,GADD45A,GADD45B,GADD45G,H1-2,H3-3A/H3-3B,HIF1A,IDH2,LDHA,MAP1LC3A,MAP1LC3B,MT-ND1,MT-ND2,MT-ND3,MT-ND4,MT-ND4L,MT-ND5,NDUFA11,NDUFA12,NDUFA13,NDUFA2,NDUFA3,NDUFA4,NDUFA5,NDUFA8,NDUFA9,NDUFAB1,NDUFB4,NDUFB6,NDUFB7,NDUFB8,NDUFB9,NDUFS3,NDUFS4,NDUFS6,NDUFS8,NDUFV2,NFE2L2,PGAM1,POLR1D,POLR2F,RELA,SCNN…
Regulation of eIF4 and p70S6K Signaling	20.6	0.318	1.508	EIF1AX,EIF1AY,EIF2S1,EIF2S2,EIF3B,EIF3C,EIF3D,EIF3E,EIF3F,EIF3G,EIF3H,EIF3I,EIF3K,EIF3L,EIF3M,EIF4A1,EIF4A3,EIF4E,EIF4G2,HRAS,ITGA3,ITGB1,MAPK13,PABPC1,PAIP2,PPP2CA,PPP2CB,PPP2R1A,RALA,RAP1A,RAP1B,RPS10,RPS11,RPS13,RPS16,RPS17,RPS18,RPS19,RPS2,RPS20,RPS26,RPS27L,RPS28,RPS3,RPS4Y1,RPS5,RPS6,RPS7,RPSA,RRAS
mTOR Signaling	16.1	0.248	2.828	Cdc42,DDIT4,EIF3B,EIF3C,EIF3D,EIF3E,EIF3F,EIF3G,EIF3H,EIF3I,EIF3K,EIF3L,EIF3M,EIF4A1,EIF4A3,EIF4E,EIF4G2,FKBP1A,HIF1A,HRAS,PPP2CA,PPP2CB,PPP2R1A,PRKCI,RAC1,RALA,RAP1A,RAP1B,RHEB,RHOA,RHOC,RHOD,RPS10,RPS11,RPS13,RPS16,RPS17,RPS18,RPS19,RPS2,RPS20,RPS26,RPS27L,RPS28,RPS3,RPS4Y1,RPS5,RPS6,RPS7,RPSA,RRAS,VEGFA
NRF2-mediated Oxidative Stress Response	16.1	0.259	4.802	ACTB,ACTG1,AKR1A1,CAT,CCT7,CDC34,DNAJA2,DNAJB1,DNAJB11,DNAJB6,DNAJC5,DNAJC8,DNAJC9,EPHX1,ERP29,FTH1,FTL,GCLC,GCLM,GPX2,GSR,GSTA3,GSTM5,GSTP1,HACD3,HERPUD1,HRAS,HSPB8,JUNB,JUND,MAFF,MAFG,MAP2K3,MGST1,MGST3,NFE2L2,PRDX1,PRKCI,RALA,RAP1A,RAP1B,RRAS,SQSTM1,STIP1,TXN,TXNRD1,UBE2K,USP14,VCP
Remodeling of Epithelial Adherens Junctions	14.1	0.397	2.714	ACTB,ACTG1,ACTN1,ACTN4,ACTR2,ARPC1B,ARPC2,ARPC3,ARPC4,ARPC5,ARPC5L,CLIP1,CTNNA1,CTNNB1,CTNND1,MAPRE1,MET,NME1,RAB5C,RALA,TUBA1A,TUBA1B,TUBA1C,TUBB,TUBB2A,TUBB4B,VCL
Epithelial Adherens Junction Signaling	12.8	0.257	#NUM!	ACTB,ACTG1,ACTN1,ACTN4,ACTR2,ARPC1B,ARPC2,ARPC3,ARPC4,ARPC5,ARPC5L,BAIAP2,CLIP1,CTNNA1,CTNNB1,CTNND1,HRAS,LMO7,MET,MYH14,MYH9,MYL6,NECTIN1,NECTIN2,NECTIN3,RAC1,RALA,RAP1A,RAP1B,RHOA,RRAS,SSX2IP,TUBA1A,TUBA1B,TUBA1C,TUBB,TUBB2A,TUBB4B,VCL
Actin Cytoskeleton Signaling	10.5	0.202	4.427	ACTB,ACTG1,ACTN1,ACTN4,ACTR2,ARPC1B,ARPC2,ARPC3,ARPC4,ARPC5,ARPC5L,BAIAP2,BRK1,CD14,CFL1,CFL2,EZR,FLNA,GSN,HRAS,ITGA3,ITGB1,LBP,MPRIP,MSN,MYH14,MYH9,MYL12A,MYL12B,MYL6,PDGFA,PFN1,PPP1CB,PPP1R12A,RAC1,RALA,RAP1A,RAP1B,RHOA,ROCK1,RRAS,TLN1,VCL,WASF2
Hypoxia Signaling in the Cardiovascular System	10.4	0.324	2.828	BIRC6,CDC34,COPS5,CREB3,HIF1A,HSP90AA1,HSP90AB1,LDHA,MDM2,NFKBIA,NFKBIB,SUMO1,UBE2A,UBE2B,UBE2D2,UBE2D3,UBE2I,UBE2J2,UBE2K,UBE2L3,UBE2M,UBE2N,UBE2S,VEGFA
Regulation of Actin-based Motility by Rho	10.3	0.287	3.674	ACTB,ACTR2,ARHGDIA,ARPC1B,ARPC2,ARPC3,ARPC4,ARPC5,ARPC5L,BAIAP2,Cdc42,CFL1,GSN,ITGA3,ITGB1,MPRIP,MYL12A,MYL12B,MYL6,PFN1,PPP1CB,PPP1R12A,RAC1,RHOA,RHOC,RHOD,ROCK1
Sertoli Cell-Sertoli Cell Junction Signaling	9.93	0.211	#NUM!	ACTB,ACTG1,ACTN1,ACTN4,CGN,CLDN18,CLDN3,CLDN7,CTNNA1,CTNNB1,F11R,HRAS,ILK,ITGA3,ITGB1,MAP2K3,MAPK13,NECTIN1,NECTIN2,NECTIN3,OCLN,PRKAR1A,PRKAR2A,RAC1,RALA,RAP1A,RAP1B,RRAS,SPTAN1,SPTBN1,TJP1,TJP2,TUBA1A,TUBA1B,TUBA1C,TUBB,TUBB2A,TUBB4B,VCL
Antigen Presentation Pathway	9.91	0.436	#NUM!	B2M,CALR,CD74,HLA-A,HLA-DMB,HLA-DQA1,HLA-DQB1,HLA-DRB5,HLA-E,PDIA3,PSMB5,PSMB6,PSMB8,PSMB9,TAP1,TAP2,TAPBP
Integrin Signaling	9.13	0.192	5	ACTB,ACTG1,ACTN1,ACTN4,ACTR2,ARF1,ARF4,ARPC1B,ARPC2,ARPC3,ARPC4,ARPC5,ARPC5L,CAPN2,CAPNS1,Cdc42,CTTN,GSN,HRAS,ILK,ITGA3,ITGA9,ITGAV,ITGB1,MPRIP,MYL12A,MYL12B,PFN1,PPP1CB,PPP1R12A,RAC1,RALA,RAP1A,RAP1B,RHOA,RHOC,RHOD,ROCK1,RRAS,TLN1,VCL
Actin Nucleation by ARP-WASP Complex	9.06	0.306	4.146	ACTR2,ARPC1B,ARPC2,ARPC3,ARPC4,ARPC5,ARPC5L,BAIAP2,Cdc42,HRAS,ITGA3,ITGB1,PPP1R12A,RAC1,RALA,RAP1A,RAP1B,RHOA,RHOC,RHOD,ROCK1,RRAS
PI3K/AKT Signaling	8.35	0.2	3.286	BCL2L1,CCND1,CDC37,CDKN1A,CTNNB1,EIF4E,GDF15,HRAS,HSP90AA1,HSP90AB1,IL10RB,IL18R1,IL4R,ILK,ITGA3,ITGB1,MCL1,MDM2,NFKBIA,NFKBIB,PPP2CA,PPP2CB,PPP2R1A,RALA,RAP1A,RAP1B,RELA,RHEB,RRAS,SFN,YWHAB,YWHAE,YWHAH,YWHAQ,YWHAZ
Tight Junction Signaling	8.27	0.202	#NUM!	ACTB,ACTG1,CDK4,CEBPA,CGN,CLDN18,CLDN3,CLDN7,CTNNA1,CTNNB1,F11R,MYH14,MYH9,MYL6,NAPA,NECTIN1,NECTIN2,NECTIN3,NUDT21,OCLN,PPP2CA,PPP2CB,PPP2R1A,PRKAR1A,PRKAR2A,PRKCI,RAC1,RELA,RHOA,SPTAN1,TJP1,TJP2,VAPA,VCL
Clathrin-mediated Endocytosis Signaling	8.26	0.192	#NUM!	ACTB,ACTG1,ACTR2,AP1S1,AP2M1,AP2S1,APOE,ARPC1B,ARPC2,ARPC3,ARPC4,ARPC5,ARPC5L,CLTA,CLTB,CLU,CSNK2B,CTTN,HSPA8,ITGB1,LDLR,LYZ,MDM2,MET,PDGFA,PON1,PPP3CA,RAB11A,RAB5C,RAC1,SH3GLB1,TF,TFRC,TSG101,Ubb,UBC,VEGFA
Germ Cell-Sertoli Cell Junction Signaling	8.06	0.199	#NUM!	ACTB,ACTG1,ACTN1,ACTN4,Cdc42,CFL1,CFL2,CTNNA1,CTNNB1,CTNND1,GSN,HRAS,ILK,ITGA3,ITGB1,MAP2K3,NECTIN2,NECTIN3,RAC1,RALA,RAP1A,RAP1B,RHOA,RHOC,RHOD,RRAS,TJP1,TUBA1A,TUBA1B,TUBA1C,TUBB,TUBB2A,TUBB4B,VCL
Phagosome Maturation	7.75	0.205	#NUM!	ATP6V0E1,ATP6V1C2,ATP6V1D,ATP6V1F,B2M,CALR,CTSB,CTSC,CTSD,CTSH,Dync1i2,DYNLL1,DYNLRB1,HLA-A,HLA-DRB5,HLA-E,LAMP1,NAPA,PRDX1,PRDX2,PRDX5,PRDX6,RAB5C,TAP1,TSG101,TUBA1A,TUBA1B,TUBA1C,TUBB,TUBB2A,TUBB4B
Cdc42 Signaling	7.23	0.192	2.711	ACTR2,ARPC1B,ARPC2,ARPC3,ARPC4,ARPC5,ARPC5L,B2M,BAIAP2,CDC42BPA,CDC42SE1,CFL1,CFL2,CLIP1,EXOC4,HLA-A,HLA-DMB,HLA-DQA1,HLA-DQB1,HLA-DRB5,HLA-E,ITGA3,ITGB1,MAPK13,MPRIP,MYL12A,MYL12B,MYL6,PPP1CB,PPP1R12A,PRKCI,RALA
RhoGDI Signaling	6.96	0.183	-3.78	ACTB,ACTG1,ACTR2,ARHGDIA,ARPC1B,ARPC2,ARPC3,ARPC4,ARPC5,ARPC5L,CD44,Cdc42,CFL1,CFL2,EZR,GNAI2,GNAS,GNB1,GNB2,GNG5,ITGA3,ITGB1,MSN,MYL12A,MYL12B,MYL6,PPP1R12A,RAC1,RHOA,RHOC,RHOD,ROCK1,WASF2
HIPPO signaling	6.88	0.247	-1.941	CD44,PPP1CA,PPP1CB,Ppp1cc,PPP1R11,PPP1R12A,PPP1R14B,PPP1R14C,PPP2CA,PPP2CB,PPP2R1A,RASSF1,SFN,SKP1,TJP2,WWTR1,YWHAB,YWHAE,YWHAH,YWHAQ,YWHAZ
CDK5 Signaling	6.83	0.222	0.853	EGR1,FOSB,GNAS,HRAS,ITGA3,ITGB1,LAMA5,MAPK13,PPP1CA,PPP1CB,Ppp1cc,PPP1R11,PPP1R12A,PPP1R14B,PPP1R14C,PPP2CA,PPP2CB,PPP2R1A,PRKAR1A,PRKAR2A,RALA,RAP1A,RAP1B,RRAS
Huntington's Disease Signaling	6.78	0.165	1.069	ATP5F1A,ATP5F1B,ATP5F1C,ATP5F1D,ATP5MC1,ATP5PB,ATP5PF,BAX,BCL2L1,CAPN2,CAPNS1,CLTA,CLTB,CREB3,CTSD,CYCS,DCTN1,DNAJB1,DNAJC5,GNB1,GNB2,GNG5,HRAS,HSPA1A/HSPA1B,HSPA4,HSPA8,NAPA,POLR2C,POLR2F,POLR2G,POLR2J,POLR2L,PRKCI,PSME1,PSME2,SDHB,Ubb,UBC,UBE2S
Coronavirus Pathogenesis Pathway	6.7	0.193	-3.024	BAX,CCND1,CDK4,EEF1A1,EIF4E,MAPK13,NFKBIA,NFKBIB,NPM1,PA2G4,RELA,RPS10,RPS11,RPS13,RPS16,RPS17,RPS18,RPS19,RPS2,RPS20,RPS26,RPS27L,RPS28,RPS3,RPS4Y1,RPS5,RPS6,RPS7,RPSA
fMLP Signaling in Neutrophils	6.22	0.207	3.962	ACTR2,ARPC1B,ARPC2,ARPC3,ARPC4,ARPC5,ARPC5L,Calm1 (includes others),GNAI2,GNAS,GNB1,GNB2,GNG5,HRAS,NFKBIA,NFKBIB,PPP3CA,PRKCI,RAC1,RALA,RAP1A,RAP1B,RELA,RRAS
Estrogen Receptor Signaling	6.18	0.143	5.217	ATP5F1A,ATP5F1C,ATP5F1D,ATP5MC1,ATP5PB,CCND1,CDKN1A,CFL1,CFL2,CREB3,CYC1,DDX5,EIF4E,GNAI2,GNAS,GNB1,GNG5,HES1,HIF1A,HRAS,HSP90AA1,HSP90AB1,MED10,MED21,MED30,MPRIP,MYL12A,MYL12B,MYL6,PDIA3,PPP1CB,PPP1R12A,PRKAR1A,PRKAR2A,PRKCI,RALA,RAP1A,RAP1B,RELA,RHOA,ROCK1,RRAS,SDHD,SRA1,UQCRC2,UQCRFS1,VEGFA
Ephrin Receptor Signaling	5.96	0.172	4.811	ACP1,ACTR2,ARPC1B,ARPC2,ARPC3,ARPC4,ARPC5,ARPC5L,CFL1,CFL2,CREB3,EFNA1,EPHA2,GNAI2,GNAS,GNB1,GNB2,GNG5,HRAS,ITGA3,ITGB1,PDGFA,RAC1,RALA,RAP1A,RAP1B,RHOA,ROCK1,RRAS,SDCBP,VEGFA
Rac Signaling	5.92	0.205	4.69	ACTR2,ARPC1B,ARPC2,ARPC3,ARPC4,ARPC5,ARPC5L,BAIAP2,BRK1,CD44,CFL1,CFL2,HRAS,ITGA3,ITGB1,PRKCI,RAC1,RALA,RAP1A,RAP1B,RELA,RHOA,RRAS
Superpathway of Cholesterol Biosynthesis	5.88	0.379	-2.714	ACAT2,CYP51A1,DHCR24,EBP,FDPS,HMGCR,HMGCS1,IDI1,MSMO1,NSDHL,PMVK
ERK/MAPK Signaling	5.76	0.166	1.134	CREB3,DUSP1,DUSP6,EIF4E,H3-3A/H3-3B,HRAS,HSPB1,ITGA3,ITGB1,PLA2G1B,PPP1CA,PPP1CB,PPP1R11,PPP1R12A,PPP1R14B,PPP1R14C,PPP2CA,PPP2CB,PPP2R1A,PRKAR1A,PRKAR2A,PRKCI,RAC1,RALA,RAP1A,RAP1B,RRAS,TLN1,YWHAB,YWHAH,YWHAQ,YWHAZ
Virus Entry via Endocytic Pathways	5.71	0.206	#NUM!	ACTB,ACTG1,AP1S1,AP2M1,AP2S1,B2M,CLTA,CLTB,CXADR,FLNA,HLA-A,HLA-E,HRAS,ITGA3,ITGB1,PRKCI,RAC1,RALA,RAP1A,RAP1B,RRAS,TFRC
Unfolded protein response	5.57	0.268	1.508	CALR,CEBPA,CEBPB,DNAJA2,HSPA1A/HSPA1B,HSPA4,HSPA8,INSIG1,NFE2L2,OS9,PPP1R15A,SREBF1,SREBF2,UBXN4,VCP
Leukocyte Extravasation Signaling	5.56	0.162	4.041	ACTB,ACTG1,ACTN1,ACTN4,CD44,CLDN18,CLDN3,CLDN7,CTNNA1,CTNNB1,CTNND1,CTTN,CYBA,EZR,F11R,GNAI2,ICAM1,ITGA3,ITGB1,MAPK13,MSN,MYL6,PRKCI,RAC1,RAP1A,RAP1B,RAP1GAP,RHOA,ROCK1,TIMP2,TIMP3,VCL
Glucocorticoid Receptor Signaling	5.51	0.137	#NUM!	ACTB,ANXA1,BCL2L1,CDKN1A,CEBPA,CEBPB,DUSP1,GTF2A2,GTF2B,GTF2H5,HRAS,HSP90AA1,HSP90AB1,HSPA1A/HSPA1B,HSPA4,HSPA8,ICAM1,KRT18,KRT19,KRT23,KRT7,KRT8,MAPK13,NFKBIA,NFKBIB,POLR2C,POLR2F,POLR2G,POLR2J,POLR2L,PPP3CA,PTGES3,RAC1,RALA,RAP1A,RAP1B,RELA,RRAS,SLPI,SMARCE1,SRA1,SUMO1,TAF10,TSG101,UBE2I,YWHAH
ILK Signaling	5.45	0.163	2.646	ACTB,ACTG1,ACTN1,ACTN4,CCND1,Cdc42,CFL1,CFL2,CREB3,CTNNB1,FLNA,HIF1A,ILK,ITGB1,KRT18,MYH14,MYH9,MYL6,PPP1R12A,PPP1R14B,PPP2CA,PPP2CB,PPP2R1A,RAC1,RELA,RHOA,RHOC,RHOD,RSU1,VCL,VEGFA
Regulation of Cellular Mechanics by Calpain Protease	5.37	0.246	2.53	ACTN1,ACTN4,CAPN2,CAPNS1,CCND1,CDK4,EZR,HRAS,ITGA3,ITGB1,RALA,RAP1A,RAP1B,RRAS,TLN1,VCL
RhoA Signaling	5.2	0.187	3.545	ACTB,ACTG1,ACTR2,ARPC1B,ARPC2,ARPC3,ARPC4,ARPC5,ARPC5L,BAIAP2,CFL1,CFL2,EZR,MPRIP,MSN,MYL12A,MYL12B,MYL6,PFN1,PPP1CB,PPP1R12A,RHOA,ROCK1
p53 Signaling	5.19	0.204	1.265	BAX,BCL2L1,CCND1,CCND2,CCNG1,CDK4,CDKN1A,CTNNB1,DRAM1,GADD45A,GADD45B,GADD45G,HIF1A,MDM2,PERP,SERPINE2,SFN,ST13,THBS1,TP53INP1
VEGF Signaling	5.12	0.202	3.357	ACTB,ACTG1,ACTN1,ACTN4,BCL2L1,EIF1AX,EIF1AY,EIF2S1,EIF2S2,HIF1A,HRAS,RALA,RAP1A,RAP1B,ROCK1,RRAS,SFN,VCL,VEGFA,YWHAE
IL-8 Signaling	4.98	0.155	4.914	BAX,BCL2L1,CCND1,CCND2,CCND3,Cdc42,CSTB,GNAI2,GNAS,GNB1,GNB2,GNG5,HBEGF,HRAS,ICAM1,ITGAV,LASP1,MYL12B,NFKBIB,PRKCI,RAC1,RALA,RAP1A,RAP1B,RELA,RHOA,RHOC,RHOD,ROCK1,RRAS,VEGFA
Axonal Guidance Signaling	4.92	0.12	#NUM!	ACTR2,ADAM19,ADAM9,ARPC1B,ARPC2,ARPC3,ARPC4,ARPC5,ARPC5L,BAIAP2,BMP4,CFL1,CFL2,COPS5,DPYSL2,EFNA1,EIF4E,EPHA2,GNAI2,GNAS,GNB1,GNB2,GNG5,HRAS,ITGA3,ITGB1,MET,MME,MYL12A,MYL12B,MYL6,NRP1,PDGFA,PDIA3,PFN1,PLXNB2,PPP3CA,PRKAR1A,PRKAR2A,PRKCI,PSMD14,RAC1,RALA,RAP1A,RAP1B,RHOA,RHOD,ROCK1,RRAS,RTN4,SDCBP,TUBA1A,TUBA1B,TUBA1C,TUBB,TUBB2A,TUBB4B,VEGFA
GADD45 Signaling	4.82	0.421	#NUM!	CCND1,CCND2,CCND3,CDK4,CDKN1A,GADD45A,GADD45B,GADD45G
BAG2 Signaling Pathway	4.77	0.279	0.577	ANXA2,CDKN1A,CTSB,HSP90AA1,HSPA1A/HSPA1B,HSPA4,HSPA8,MDM2,PSME1,PSME2,RELA,STUB1
Production of Nitric Oxide and Reactive Oxygen Species in Macrophages	4.66	0.154	0.784	APOE,CAT,Cdc42,CLU,CYBA,IFNGR2,IRF1,LYZ,MAPK13,NFKBIA,NFKBIB,PON1,PPP1CA,PPP1CB,PPP1R11,PPP1R12A,PPP1R14B,PPP1R14C,PPP2CA,PPP2CB,PPP2R1A,PRKCI,RAC1,RAP1A,RAP1B,RELA,RHOA,RHOC,RHOD
CCR3 Signaling in Eosinophils	4.63	0.177	2.53	Calm1 (includes others),CFL1,CFL2,GNAI2,GNAS,GNB1,GNB2,GNG5,HRAS,MAPK13,MPRIP,PLA2G1B,PPP1CB,PPP1R12A,PRKCI,RAC1,RALA,RAP1A,RAP1B,RHOA,ROCK1,RRAS
Apoptosis Signaling	4.57	0.192	0.688	BAX,BCL2L1,BIRC6,CAPN2,CAPNS1,CYCS,DIABLO,HRAS,LMNA,MCL1,NFKBIA,NFKBIB,RALA,RAP1A,RAP1B,RELA,ROCK1,RRAS,SPTAN1
Protein Kinase A Signaling	4.53	0.123	1.581	ACP1,AKAP13,AKAP7,ANAPC11,Calm1 (includes others),CAMK2D,CREB3,CTNNB1,DUSP1,DUSP3,DUSP6,FLNA,GNAI2,GNAS,GNB1,GNB2,GNG5,H1-2,H3-3A/H3-3B,MYL12A,MYL12B,MYL6,NFKBIA,NFKBIB,PDIA3,PPP1CA,PPP1CB,Ppp1cc,PPP1R11,PPP1R12A,PPP1R14B,PPP1R14C,PPP3CA,PRKAR1A,PRKAR2A,PRKCI,PTP4A1,PTPRF,RAP1A,RAP1B,RELA,RHOA,ROCK1,SFN,YWHAB,YWHAE,YWHAH,YWHAQ,YWHAZ
Signaling by Rho Family GTPases	4.4	0.139	4.6	ACTB,ACTG1,ACTR2,ARPC1B,ARPC2,ARPC3,ARPC4,ARPC5,ARPC5L,BAIAP2,Cdc42,CFL1,CFL2,CLIP1,EZR,GNAI2,GNAS,GNB1,GNB2,GNG5,ITGA3,ITGB1,MSN,MYL12A,MYL12B,MYL6,PPP1R12A,PRKCI,RAC1,RELA,RHOA,RHOC,RHOD,ROCK1
HIF1α Signaling	4.36	0.146	1.671	CAMK2D,CDKN1A,COPS5,EIF4E,ELOC,GPI,HIF1A,HRAS,HSP90AA1,HSPA1A/HSPA1B,HSPA4,HSPA8,LDHA,MAP2K3,MDM2,MET,PKM,PPP3CA,PRKCI,RACK1,RALA,RAN,RAP1A,RAP1B,RPS6,RRAS,SAT1,STUB1,TF,VEGFA
Mechanisms of Viral Exit from Host Cells	4.25	0.268	#NUM!	ACTB,ACTG1,CHMP2A,CHMP2B,CHMP3,CHMP4B,PDCD6IP,PRKCI,SH3GLB1,TSG101,VPS36
Xenobiotic Metabolism PXR Signaling Pathway	4.08	0.146	2.268	CAMK2D,CAT,CES1,CITED2,CYP2B6,ESD,GSTA3,GSTM5,GSTP1,HS2ST1,HSP90AA1,HSP90AB1,MGST1,MGST3,PPM1A,PPP1CA,PPP1CB,Ppp1cc,PPP1R11,PPP1R12A,PPP1R14B,PPP1R14C,PRKAR1A,PRKAR2A,PRKCI,SCAND1,SNW1,SRA1
Androgen Signaling	4	0.162	1.414	Calm1 (includes others),CALR,CCND1,DNAJB1,GNAI2,GNAS,GNB1,GNB2,GNG5,GTF2B,GTF2H5,HSP90AA1,HSPA4,POLR2C,POLR2F,POLR2G,POLR2J,POLR2L,PRKAR1A,PRKAR2A,PRKCI,RELA
Prostate Cancer Signaling	4	0.187	#NUM!	CCND1,CDKN1A,CREB3,CTNNB1,GSTP1,HRAS,HSP90AA1,HSP90AB1,MDM2,NFKBIA,NFKBIB,PA2G4,RALA,RAP1A,RAP1B,RELA,RRAS
14-3-3-mediated Signaling	3.98	0.165	3.606	BAX,HRAS,PDCD6IP,PDIA3,PRKCI,RALA,RAP1A,RAP1B,RRAS,SFN,TUBA1A,TUBA1B,TUBA1C,TUBB,TUBB2A,TUBB4B,YWHAB,YWHAE,YWHAH,YWHAQ,YWHAZ
p70S6K Signaling	3.88	0.163	2.324	BCAP31,EEF2,GNAI2,HRAS,IL4R,PDIA3,PPP2CA,PPP2CB,PPP2R1A,PRKCI,RALA,RAP1A,RAP1B,RPS6,RRAS,SFN,YWHAB,YWHAE,YWHAH,YWHAQ,YWHAZ
LXR/RXR Activation	3.82	0.165	-1.155	ACACA,APOE,C3,CD14,CLU,CYP51A1,ECHS1,FASN,HMGCR,IL33,ITIH4,LBP,LDLR,LPL,LYZ,PON1,RELA,SCD,SREBF1,TF
Hereditary Breast Cancer Signaling	3.81	0.157	#NUM!	ACTB,CCND1,CDK4,CDKN1A,GADD45A,GADD45B,GADD45G,HRAS,NPM1,POLR2C,POLR2F,POLR2G,POLR2J,POLR2L,RALA,RAP1A,RAP1B,RRAS,SFN,SMARCE1,Ubb,UBC
IGF-1 Signaling	3.76	0.173	2.53	CCN1,CSNK2B,HRAS,IGFBP7,PRKAR1A,PRKAR2A,PRKCI,RALA,RAP1A,RAP1B,RRAS,SFN,SOCS3,YWHAB,YWHAE,YWHAH,YWHAQ,YWHAZ
Gluconeogenesis I	3.68	0.308	2.121	ALDOA,ENO1,GAPDH,GPI,MDH1,MDH2,ME1,PGAM1
Endocannabinoid Developing Neuron Pathway	3.66	0.165	3.638	CCND1,CREB3,CTNNB1,GNAI2,GNB1,GNG5,HRAS,MAP2K3,MAPK13,MGLL,PRKAR1A,PRKAR2A,RAC1,RALA,RAP1A,RAP1B,RAP1GAP,RHOA,RRAS
Ephrin B Signaling	3.59	0.194	1.667	ACP1,CFL1,CFL2,CTNNB1,GNAI2,GNAS,GNB1,GNB2,GNG5,HNRNPK,HRAS,RAC1,RHOA,ROCK1
Role of PKR in Interferon Induction and Antiviral Response	3.56	0.162	-0.471	ATF3,BAX,CYCS,EIF2S1,HSP90AA1,HSP90AB1,HSPA1A/HSPA1B,HSPA4,HSPA8,IFNGR2,IRF1,MAP2K3,MAPK13,METAP2,NFKBIA,NFKBIB,NPM1,PDGFA,RELA
Role of Tissue Factor in Cancer	3.56	0.162	#NUM!	BCL2L1,CCN1,CFL1,CFL2,EGR1,EIF4E,F3,HBEGF,HRAS,ITGA3,ITGAV,ITGB1,MAPK13,RAC1,RALA,RAP1A,RAP1B,RRAS,VEGFA
Paxillin Signaling	3.55	0.167	4	ACTB,ACTG1,ACTN1,ACTN4,ARF1,HRAS,ITGA3,ITGA9,ITGAV,ITGB1,MAPK13,RAC1,RALA,RAP1A,RAP1B,RRAS,TLN1,VCL
Caveolar-mediated Endocytosis Signaling	3.52	0.192	#NUM!	ACTB,ACTG1,B2M,CAVIN1,COPE,FLNA,FLOT1,HLA-A,HLA-E,ITGA3,ITGA9,ITGAV,ITGB1,RAB5C
Iron homeostasis signaling pathway	3.51	0.153	#NUM!	ATP6V0E1,ATP6V1C2,ATP6V1D,ATP6V1F,BMP4,CIAO2B,EPAS1,FTH1,FTL,GDF15,HIF1A,HMOX2,HP,ISCU,NUBP1,PCBP1,PDGFA,SKP1,SLC48A1,TF,TFRC
Glioma Invasiveness Signaling	3.46	0.189	2.309	CD44,Cdc42,HRAS,ITGAV,RAC1,RALA,RAP1A,RAP1B,RHOA,RHOC,RHOD,RRAS,TIMP2,TIMP3
Synaptic Long Term Potentiation	3.44	0.155	1.789	Calm1 (includes others),CAMK2D,CREB3,HRAS,PDIA3,PPP1CA,PPP1CB,Ppp1cc,PPP1R11,PPP1R12A,PPP1R14B,PPP1R14C,PPP3CA,PRKAR1A,PRKAR2A,PRKCI,RALA,RAP1A,RAP1B,RRAS
Reelin Signaling in Neurons	3.44	0.155	3.771	ACTR2,APBB1,APOE,ARPC1B,ARPC2,ARPC3,ARPC4,ARPC5,ARPC5L,CAMK2D,CFL1,ITGA3,ITGB1,MAP2K3,NECTIN3,PAFAH1B1,RAC1,RAP1A,RAP1B,RHOA
CD28 Signaling in T Helper Cells	3.41	0.158	3.464	ACTR2,ARPC1B,ARPC2,ARPC3,ARPC4,ARPC5,ARPC5L,BCL10,Calm1 (includes others),HLA-A,HLA-DMB,HLA-DQA1,HLA-DQB1,HLA-DRB5,NFKBIA,NFKBIB,PPP3CA,RAC1,RELA
Semaphorin Neuronal Repulsive Signaling Pathway	3.39	0.154	-1.342	CD44,CFL1,CFL2,DPYSL2,ITGA3,ITGB1,MAP2K3,MPRIP,MYL12A,MYL12B,MYL6,NRP1,PPP1CB,PPP1R12A,PRKAR1A,PRKAR2A,RAC1,RHOA,ROCK1,RRAS
Sumoylation Pathway	3.33	0.165	-0.577	ARHGDIA,Cdc42,CEBPA,ISG20,MDM2,NFKBIA,RAC1,RAN,RHOA,RHOC,RHOD,SERBP1,STUB1,SUMO1,SUMO2,SUMO3,UBE2I
Interferon Signaling	3.32	0.25	2.333	BAX,IFI35,IFITM3,IFNGR2,IRF1,ISG15,PSMB8,RELA,TAP1
Synaptogenesis Signaling Pathway	3.28	0.119	4.226	ACTR2,AP2M1,AP2S1,APOE,ARPC1B,ARPC2,ARPC3,ARPC4,ARPC5,ARPC5L,Calm1 (includes others),CAMK2D,CFL1,CREB3,CTNNB1,CTNND1,DNAJC5,EFNA1,EPHA2,HRAS,HSPA8,NAP1L1,NAPA,NECTIN1,NECTIN3,PAFAH1B1,PRKAR1A,PRKAR2A,RAB5C,RAC1,RALA,RAP1A,RAP1B,RHOA,RRAS,THBS1,TLN1
Semaphorin Signaling in Neurons	3.27	0.2	#NUM!	Cdc42,CFL1,CFL2,DPYSL2,ITGB1,MET,NRP1,RAC1,RHOA,RHOC,RHOD,ROCK1
Aryl Hydrocarbon Receptor Signaling	3.26	0.147	0.775	BAX,CCND1,CCND2,CCND3,CDK4,CDKN1A,CTSD,GSTA3,GSTM5,GSTP1,HSP90AA1,HSP90AB1,HSPB1,MDM2,MGST1,MGST3,NCOA7,NEDD8,NFE2L2,PTGES3,RELA
IL-6 Signaling	3.19	0.152	2.668	CD14,CEBPB,CSNK2B,HRAS,HSPB1,IL33,LBP,MAP2K3,MAPK13,MCL1,NFKBIA,NFKBIB,RALA,RAP1A,RAP1B,RELA,RRAS,SOCS3,VEGFA
Thrombin Signaling	3.13	0.13	4	CAMK2D,Cdc42,GNAI2,GNAS,GNB1,GNB2,GNG5,HRAS,MAPK13,MPRIP,MYL12A,MYL12B,MYL6,PDIA3,PPP1CB,PPP1R12A,PRKCI,RAC1,RALA,RAP1A,RAP1B,RELA,RHOA,RHOC,RHOD,ROCK1,RRAS
Glutathione Redox Reactions I	3.13	0.292	2.646	GPX2,GPX4,GSR,GSTP1,MGST1,MGST3,PRDX6
Chemokine Signaling	3.1	0.175	1.604	Calm1 (includes others),CAMK2D,CFL1,GNAI2,HRAS,MAPK13,MPRIP,PPP1CB,PPP1R12A,RALA,RAP1A,RAP1B,RHOA,RRAS
Superpathway of Geranylgeranyldiphosphate Biosynthesis I (via Mevalonate)	3.09	0.333	-2.449	ACAT2,FDPS,HMGCR,HMGCS1,IDI1,PMVK
FAT10 Signaling Pathway	3.09	0.333	#NUM!	MAP1LC3B,NUB1,PSMD4,PSME1,PSME2,SQSTM1
Xenobiotic Metabolism Signaling	3.06	0.118	#NUM!	CAMK2D,CAT,CES1,CITED2,CYP2B6,ESD,FTL,GCLC,GSTA3,GSTM5,GSTP1,HRAS,HS2ST1,HSP90AA1,HSP90AB1,MAP2K3,MAPK13,MGST1,MGST3,NFE2L2,PPP2CA,PPP2CB,PPP2R1A,PRKCI,PTGES3,RALA,RAP1A,RAP1B,RELA,RRAS,SCAND1,SNW1,SRA1,SUMO1
ERK5 Signaling	3.05	0.181	3.606	CREB3,HRAS,RALA,RAP1A,RAP1B,RRAS,SFN,WNK1,YWHAB,YWHAE,YWHAH,YWHAQ,YWHAZ
Hepatic Fibrosis Signaling Pathway	3.02	0.111	3.592	BAMBI,Calm1 (includes others),CCND1,Cdc42,CEBPB,CREB3,CTNNB1,FTH1,FTL,GNAI2,HIF1A,HRAS,ICAM1,IL33,ITGA3,ITGB1,MAP2K3,MAPK13,MYL12A,MYL12B,MYL6,NFKBIA,NFKBIB,PDGFA,PRKAR1A,PRKAR2A,PRKCI,RAC1,RALA,RAP1A,RAP1B,RELA,RHOA,RHOC,RHOD,ROCK1,RRAS,SDHB,TF,TFRC,VEGFA
LPS-stimulated MAPK Signaling	2.99	0.171	3.606	CD14,HRAS,LBP,MAP2K3,MAPK13,NFKBIA,NFKBIB,PRKCI,RAC1,RALA,RAP1A,RAP1B,RELA,RRAS
PEDF Signaling	2.99	0.171	1.732	BCL2L1,HRAS,MAPK13,NFKBIA,NFKBIB,RAC1,RALA,RAP1A,RAP1B,RELA,RHOA,ROCK1,RRAS,WASF2
Insulin Receptor Signaling	2.98	0.143	2.236	ACLY,EIF4E,HRAS,PPP1CA,PPP1CB,Ppp1cc,PPP1R11,PPP1R12A,PPP1R14B,PPP1R14C,PRKAR1A,PRKAR2A,PRKCI,PTPRF,RALA,RAP1A,RAP1B,RRAS,SCNN1A,SOCS3
Cholesterol Biosynthesis I	2.96	0.385	-1.342	CYP51A1,DHCR24,EBP,MSMO1,NSDHL
Cholesterol Biosynthesis II (via 24,25-dihydrolanosterol)	2.96	0.385	-1.342	CYP51A1,DHCR24,EBP,MSMO1,NSDHL
Cholesterol Biosynthesis III (via Desmosterol)	2.96	0.385	-1.342	CYP51A1,DHCR24,EBP,MSMO1,NSDHL
Pentose Phosphate Pathway (Oxidative Branch)	2.94	0.75	#NUM!	H6PD,PGD,PGLS
Glycolysis I	2.9	0.269	2.646	ALDOA,ENO1,GAPDH,GPI,PGAM1,PKM,TPI1
Cell Cycle: G2/M DNA Damage Checkpoint Regulation	2.89	0.204	1.414	CDKN1A,GADD45A,MDM2,SFN,SKP1,YWHAB,YWHAE,YWHAH,YWHAQ,YWHAZ
NER Pathway	2.88	0.155	1.069	COPS5,COPS6,COPS8,GPS1,GTF2H5,H3-3A/H3-3B,HMGN1,NEDD8,POLE4,POLR2C,POLR2F,POLR2G,POLR2J,POLR2L,UBE2I,UBE2N
PPAR Signaling	2.83	0.154	-2	CITED2,HRAS,HSP90AA1,HSP90AB1,IL33,NFKBIA,NFKBIB,PDGFA,RALA,RAP1A,RAP1B,RELA,RRAS,SCAND1,SNW1,SRA1
Cardiac Hypertrophy Signaling	2.82	0.121	4.707	ADSS2,Calm1 (includes others),Cdc42,EIF4E,GNAI2,GNAS,GNB1,GNB2,GNG5,HRAS,HSPB1,MAP2K3,MAPK13,MYL12A,MYL12B,MYL6,PDIA3,PPP3CA,PRKAR1A,PRKAR2A,RAC1,RALA,RAP1A,RAP1B,RHOA,RHOC,RHOD,ROCK1,RRAS
Macropinocytosis Signaling	2.82	0.171	2.121	ACTN4,CD14,HRAS,ITGB1,MET,PDGFA,PRKCI,RAC1,RALA,RAP1A,RAP1B,RHOA,RRAS
Mevalonate Pathway I	2.8	0.357	-2.236	ACAT2,HMGCR,HMGCS1,IDI1,PMVK
Necroptosis Signaling Pathway	2.73	0.134	3.273	CAMK2D,CAPN2,CAPNS1,DAPK1,FKBP1A,MDM2,PLA2G1B,PPP3CA,SLC25A3,SLC25A4,TIMM13,TIMM17A,TIMM8B,TOMM20,TOMM22,TOMM7,TSPO,UBC,VDAC1,VDAC2,VDAC3
IL-10 Signaling	2.71	0.174	#NUM!	BLVRB,CD14,IL10RB,IL33,IL4R,LBP,MAP2K3,MAPK13,NFKBIA,NFKBIB,RELA,SOCS3
Phospholipase C Signaling	2.67	0.117	3.53	AHNAK,Calm1 (includes others),Cdc42,CREB3,GNAS,GNB1,GNB2,GNG5,HRAS,ITGA3,ITGB1,MPRIP,MYL12A,MYL12B,MYL6,PEBP1,PLA2G1B,PPP1CB,PPP1R12A,PPP3CA,PRKCI,RAC1,RALA,RAP1A,RAP1B,RELA,RHOA,RHOC,RHOD,RRAS
PI3K Signaling in B Lymphocytes	2.67	0.138	3.771	ATF3,BCL10,C3,Calm1 (includes others),CAMK2D,CD81,HRAS,IL4R,NFKBIA,NFKBIB,PDIA3,PPP3CA,PRKCI,RAC1,RALA,RAP1A,RAP1B,RELA,RRAS
AMPK Signaling	2.63	0.121	0.853	ACACA,ACTB,AK1,CAB39,CCND1,CDKN1A,CREB3,EEF2,FASN,GNAS,HMGCR,MAP2K3,MAPK13,ORAI1,PPM1A,PPM1G,PPP2CA,PPP2CB,PPP2R1A,PRKAR1A,PRKAR2A,RAB11A,RAB27A,RAB2A,RAB6A,SMARCE1
iNOS Signaling	2.59	0.2	2.449	Calm1 (includes others),CD14,IFNGR2,IRF1,LBP,MAPK13,NFKBIA,NFKBIB,RELA
Cell Cycle Regulation by BTG Family Proteins	2.58	0.216	0	BTG1,BTG2,CCND1,CDK4,PPP2CA,PPP2CB,PPP2R1A,PRMT1
Type I Diabetes Mellitus Signaling	2.53	0.144	2.333	CYCS,HLA-A,HLA-DMB,HLA-DQA1,HLA-DQB1,HLA-DRB5,HLA-E,HSPD1,IFNGR2,IRF1,MAP2K3,MAPK13,NFKBIA,NFKBIB,RELA,SOCS3
Molecular Mechanisms of Cancer	2.53	0.105	#NUM!	BAX,BCL2L1,BMP4,CAMK2D,CCND1,CCND2,CCND3,Cdc42,CDK4,CDKN1A,CTNNA1,CTNNB1,CTNND1,CYCS,DIABLO,GNAI2,GNAS,HIF1A,HRAS,ITGA3,ITGB1,MAP2K3,MAPK13,MDM2,NFKBIA,NFKBIB,PA2G4,PRKAR1A,PRKAR2A,PRKCI,PSENEN,RAC1,RALA,RALBP1,RAP1A,RAP1B,RELA,RHOA,RHOC,RHOD,RRAS
Pentose Phosphate Pathway	2.52	0.4	1	H6PD,PGD,PGLS,TALDO1
Senescence Pathway	2.5	0.113	2.556	ANAPC11,ATF3,Calm1 (includes others),CAPN2,CAPNS1,CAT,CCND1,CDK4,CDKN1A,CEBPB,DHCR24,EED,EIF4E,GADD45A,GADD45B,GADD45G,HRAS,MAP2K3,MDM2,PPP1CA,PPP2CA,PPP2CB,PPP2R1A,PPP3CA,RALA,RAP1A,RAP1B,RRAS,SQSTM1,YPEL3,ZFP36L1
Gap Junction Signaling	2.46	0.121	#NUM!	ACTB,ACTG1,CTNNB1,GNAI2,GNAS,HRAS,NT5C,PDIA3,PPP3CA,PRKAR1A,PRKAR2A,PRKCI,RALA,RAP1A,RAP1B,RRAS,TJP1,TJP2,TUBA1A,TUBA1B,TUBA1C,TUBB,TUBB2A,TUBB4B
Fcγ Receptor-mediated Phagocytosis in Macrophages and Monocytes	2.42	0.149	3.742	ACTB,ACTG1,ACTR2,ARPC1B,ARPC2,ARPC3,ARPC4,ARPC5,ARPC5L,EZR,PRKCI,RAB11A,RAC1,TLN1
CXCR4 Signaling	2.4	0.126	3.9	Cdc42,EGR1,GNAI2,GNAS,GNB1,GNB2,GNG5,HRAS,MYL12A,MYL12B,MYL6,PRKCI,RAC1,RALA,RAP1A,RAP1B,RHOA,RHOC,RHOD,ROCK1,RRAS
Spliceosomal Cycle	2.39	0.188	3	CWC15,DDX39B,EIF4A3,HSPA8,RBM8A,SF3B1,SF3B2,SF3B4,SF3B6
Calcium-induced T Lymphocyte Apoptosis	2.38	0.167	2.53	Calm1 (includes others),CAPN2,HLA-A,HLA-DMB,HLA-DQA1,HLA-DQB1,HLA-DRB5,NR4A1,ORAI1,PPP3CA,PRKCI
FAK Signaling	2.37	0.147	#NUM!	ACTB,ACTG1,CAPN2,CAPNS1,HRAS,ITGA3,ITGB1,RAC1,RALA,RAP1A,RAP1B,RRAS,TLN1,VCL
Acute Phase Response Signaling	2.37	0.123	1.414	C3,C5,CEBPB,FTL,HMOX2,HNRNPK,HP,HRAS,IL33,ITIH4,LBP,MAP2K3,MAPK13,NFKBIA,NFKBIB,RALA,RAP1A,RAP1B,RELA,RRAS,SOCS3,TF
PTEN Signaling	2.35	0.135	-3.153	BCL2L1,CCND1,CDKN1A,CSNK2B,FGFR2,HRAS,ILK,ITGA3,ITGB1,MAGI3,RAC1,RALA,RAP1A,RAP1B,RELA,RRAS,YWHAH
Formaldehyde Oxidation II (Glutathione-dependent)	2.35	1	#NUM!	ADH5,ESD
Glutathione-mediated Detoxification	2.34	0.219	1.89	ANPEP,GSTA3,Gsta4,GSTM5,GSTP1,MGST1,MGST3
Neuregulin Signaling	2.33	0.146	3.162	AREG,ERRFI1,HBEGF,HRAS,HSP90AA1,HSP90AB1,ITGA3,ITGB1,PRKCI,RALA,RAP1A,RAP1B,RPS6,RRAS
α-Adrenergic Signaling	2.33	0.146	3	Calm1 (includes others),GNAI2,GNAS,GNB1,GNB2,GNG5,HRAS,PRKAR1A,PRKAR2A,PRKCI,RALA,RAP1A,RAP1B,RRAS
Dopamine Receptor Signaling	2.31	0.156	#NUM!	PPP1CA,PPP1CB,Ppp1cc,PPP1R11,PPP1R12A,PPP1R14B,PPP1R14C,PPP2CA,PPP2CB,PPP2R1A,PRKAR1A,PRKAR2A
Bladder Cancer Signaling	2.29	0.144	2.449	CCND1,CDK4,CDKN1A,DAPK1,HRAS,MDM2,PA2G4,RALA,RAP1A,RAP1B,RASSF1,RRAS,THBS1,VEGFA
PAK Signaling	2.29	0.144	3.464	CFL1,CFL2,HRAS,ITGA3,ITGB1,MYL12A,MYL12B,MYL6,PDGFA,RAC1,RALA,RAP1A,RAP1B,RRAS
Zymosterol Biosynthesis	2.29	0.5	#NUM!	CYP51A1,MSMO1,NSDHL
Melanoma Signaling	2.26	0.18	2.333	CCND1,CDK4,CDKN1A,HRAS,MDM2,RALA,RAP1A,RAP1B,RRAS
Assembly of RNA Polymerase II Complex	2.26	0.18	#NUM!	GTF2A2,GTF2B,GTF2H5,POLR2C,POLR2F,POLR2G,POLR2J,POLR2L,TAF10
Agrin Interactions at Neuromuscular Junction	2.26	0.154	3.464	ACTB,ACTG1,AGRN,CTTN,HRAS,ITGA3,ITGB1,RAC1,RALA,RAP1A,RAP1B,RRAS
Systemic Lupus Erythematosus Signaling	2.23	0.114	#NUM!	C5,C6,HLA-A,HLA-E,HNRNPA2B1,HNRNPC,HRAS,IL33,LSM2,LSM4,LSM6,PRPF40A,RALA,RAP1A,RAP1B,RRAS,SF3B4,SNRNP27,SNRPA1,SNRPB,SNRPD1,SNRPD2,SNRPD3,SNU13,TXNL4A,ZCRB1
GNRH Signaling	2.23	0.121	3.578	Calm1 (includes others),CAMK2D,CREB3,EGR1,GNAI2,GNAS,GNB1,GNG5,HBEGF,HRAS,MAP2K3,MAPK13,PRKAR1A,PRKAR2A,PRKCI,RAC1,RALA,RAP1A,RAP1B,RELA,RRAS
Regulation of IL-2 Expression in Activated and Anergic T Lymphocytes	2.21	0.146	#NUM!	BCL10,Calm1 (includes others),HRAS,NFKBIA,NFKBIB,PPP3CA,RAC1,RALA,RAP1A,RAP1B,RELA,RRAS,TOB1
Cardiac β-adrenergic Signaling	2.21	0.128	-1.387	AKAP13,AKAP7,GNAS,GNB1,GNB2,GNG5,PPP1CA,PPP1CB,Ppp1cc,PPP1R11,PPP1R12A,PPP1R14B,PPP1R14C,PPP2CA,PPP2CB,PPP2R1A,PRKAR1A,PRKAR2A
Lipid Antigen Presentation by CD1	2.19	0.231	#NUM!	AP2M1,AP2S1,B2M,CALR,PDIA3,PSAP
MIF-mediated Glucocorticoid Regulation	2.19	0.206	1.89	CD14,CD74,MIF,NFKBIA,NFKBIB,PLA2G1B,RELA
GM-CSF Signaling	2.18	0.157	2.53	BCL2L1,CAMK2D,CCND1,CISH,HRAS,PPP3CA,RACK1,RALA,RAP1A,RAP1B,RRAS
Glioma Signaling	2.18	0.136	3	Calm1 (includes others),CAMK2D,CCND1,CDK4,CDKN1A,HRAS,IDH2,MDM2,PA2G4,PDGFA,PRKCI,RALA,RAP1A,RAP1B,RRAS
Renal Cell Carcinoma Signaling	2.17	0.15	1.89	ELOC,HIF1A,HRAS,MET,RAC1,RALA,RAP1A,RAP1B,RRAS,Ubb,UBC,VEGFA
Oncostatin M Signaling	2.15	0.186	1.89	CHI3L1,EPAS1,HRAS,RALA,RAP1A,RAP1B,RRAS,TIMP3
Inhibition of ARE-Mediated mRNA Degradation Pathway	2.13	0.131	2	EXOSC7,MAPK13,PPP2CA,PPP2CB,PPP2R1A,PRKAR1A,PRKAR2A,PSME1,PSME2,SFN,YWHAB,YWHAE,YWHAH,YWHAQ,YWHAZ,ZFP36L1
NF-κB Activation by Viruses	2.09	0.146	3.464	HRAS,ITGA3,ITGAV,ITGB1,NFKBIA,NFKBIB,PRKCI,RALA,RAP1A,RAP1B,RELA,RRAS
Apelin Adipocyte Signaling Pathway	2.09	0.146	1.732	CAT,GNAI2,GPX2,GPX4,GSTP1,HIF1A,MAPK13,MGST1,MGST3,PRDX6,PRKAR1A,PRKAR2A
Oleate Biosynthesis II (Animals)	2.06	0.308	-1	CYB5A,FADS1,SCD,Scd2
Aldosterone Signaling in Epithelial Cells	2.02	0.12	#NUM!	CRYAB,DNAJB1,DNAJB11,DNAJB6,DNAJC5,DNAJC8,DNAJC9,DUSP1,HSP90AA1,HSP90AB1,HSPA1A/HSPA1B,HSPA4,HSPA8,HSPB1,HSPB8,HSPD1,PDIA3,PRKCI,SCNN1A
Role of NFAT in Regulation of the Immune Response	2.01	0.116	3.873	Calm1 (includes others),GNAI2,GNAS,GNB1,GNB2,GNG5,HLA-A,HLA-DMB,HLA-DQA1,HLA-DQB1,HLA-DRB5,HRAS,NFKBIA,NFKBIB,ORAI1,PPP3CA,RALA,RAP1A,RAP1B,RELA,RRAS
RAR Activation	1.97	0.113	#NUM!	ACTB,AKR1B10,CITED2,CSNK2B,DUSP1,GTF2H5,MAPK13,PNRC1,PRKAR1A,PRKAR2A,PRKCI,PRMT1,PRMT2,PSMC5,RAC1,RELA,RPL7A,SCAND1,SMARCE1,SNW1,SRA1,VEGFA
CREB Signaling in Neurons	1.93	0.111	3.742	Calm1 (includes others),CAMK2D,CREB3,GNAI2,GNAS,GNB1,GNB2,GNG5,GTF2B,HRAS,PDIA3,POLR2C,POLR2F,POLR2G,POLR2J,POLR2L,PRKAR1A,PRKAR2A,PRKCI,RALA,RAP1A,RAP1B,RRAS
Insulin Secretion Signaling Pathway	1.91	0.107	5.099	CAMK2D,CREB3,EIF2S1,EIF2S2,EIF4A1,EIF4A3,EIF4E,EIF4G2,GNAS,MAPK13,NAPA,PABPC1,PDIA3,PRKAR1A,PRKAR2A,PRKCI,RAP1A,RAP1B,SCNN1A,SEC11A,SPCS1,SRP14,SRP54,SRP72,SSR2,SSR4
Glutathione Biosynthesis	1.89	0.667	#NUM!	GCLC,GCLM
D-glucuronate Degradation I	1.89	0.667	#NUM!	AKR1A1,DCXR
Dopamine-DARPP32 Feedback in cAMP Signaling	1.89	0.117	1.147	Calm1 (includes others),CREB3,GNAI2,GNAS,PDIA3,PPP1CA,PPP1CB,Ppp1cc,PPP1R11,PPP1R12A,PPP1R14B,PPP1R14C,PPP2CA,PPP2CB,PPP2R1A,PPP3CA,PRKAR1A,PRKAR2A,PRKCI
Polyamine Regulation in Colon Cancer	1.87	0.227	#NUM!	AZIN1,CTNNB1,PSME1,PSME2,SAT1
Ceramide Signaling	1.85	0.136	3.464	CTSD,CYCS,DIABLO,HRAS,PPP2CA,PPP2CB,PPP2R1A,RALA,RAP1A,RAP1B,RELA,RRAS
VDR/RXR Activation	1.84	0.141	-0.816	CD14,CDKN1A,CEBPA,CEBPB,GADD45A,GTF2B,HES1,PDGFA,PRKCI,PSMC5,S100G
Opioid Signaling Pathway	1.83	0.105	3.266	AP2M1,AP2S1,Calm1 (includes others),CAMK2D,CLTA,CLTB,CREB3,CTNNB1,FOSB,GNAI2,GNAS,GNB1,GNG5,HRAS,MAP2K3,NFKBIA,OGFR,PPP3CA,PRKAR1A,PRKAR2A,PRKCI,RAC1,RALA,RAP1A,RAP1B,RRAS
BEX2 Signaling Pathway	1.8	0.139	-0.905	BEX1,CCND1,CDKN1A,CTNNB1,HIF1A,NFKBIA,PPP2CA,PPP2CB,PPP2R1A,RELA,VEGFA
G Beta Gamma Signaling	1.79	0.123	3.742	CAV2,GNAI2,GNAS,GNB1,GNB2,GNG5,HBEGF,HRAS,PRKAR1A,PRKAR2A,PRKCI,RALA,RAP1A,RAP1B,RRAS
Kinetochore Metaphase Signaling Pathway	1.76	0.129	-0.277	ANAPC11,ARPP19,BUB3,H2AZ1,MAD2L2,PPP1CA,PPP1CB,Ppp1cc,PPP1R11,PPP1R12A,PPP1R14B,PPP1R14C,ZWINT
JAK/Stat Signaling	1.76	0.138	1.508	BCL2L1,CDKN1A,CEBPB,CISH,HRAS,RALA,RAP1A,RAP1B,RELA,RRAS,SOCS3
Adipogenesis pathway	1.76	0.119	#NUM!	BMP4,BSCL2,CEBPA,CEBPB,CTNNB1,FGFR2,GTF2H5,HIF1A,KLF5,LPL,RBBP4,RBBP7,SAP18,SIN3B,SREBF1,TXNIP
Endometrial Cancer Signaling	1.75	0.15	1.667	CCND1,CTNNA1,CTNNB1,HRAS,ILK,RALA,RAP1A,RAP1B,RRAS
IL-1 Signaling	1.74	0.132	2.828	GNAI2,GNAS,GNB1,GNB2,GNG5,MAP2K3,MAPK13,NFKBIA,NFKBIB,PRKAR1A,PRKAR2A,RELA
Role of Macrophages, Fibroblasts and Endothelial Cells in Rheumatoid Arthritis	1.74	0.0994	#NUM!	C5,Calm1 (includes others),CAMK2D,CCND1,CEBPA,CEBPB,CREB3,CTNNB1,HRAS,ICAM1,IL18R1,IL33,MAP2K3,MIF,NFKBIA,NFKBIB,PDGFA,PDIA3,PPP3CA,PRKCI,RAC1,RALA,RAP1A,RAP1B,RELA,RHOA,ROCK1,RRAS,SOCS3,TRAF4,VEGFA
Sucrose Degradation V (Mammalian)	1.73	0.333	#NUM!	ALDOA,KHK,TPI1
Phosphatidylethanolamine Biosynthesis II	1.73	0.333	#NUM!	CHKA,ETNK1,PCYT2
STAT3 Pathway	1.73	0.119	1.604	CDKN1A,CISH,FGFR2,HRAS,IL10RB,IL18R1,IL4R,MAPK13,NDUFA13,RAC1,RALA,RAP1A,RAP1B,RRAS,SOCS3,VEGFA
Induction of Apoptosis by HIV1	1.71	0.148	1	BAX,BCL2L1,CYCS,DIABLO,NFKBIA,NFKBIB,RELA,SLC25A3,SLC25A4
Autophagy	1.71	0.148	#NUM!	ATG3,CTSB,CTSC,CTSD,CTSH,LAMP1,MAP1LC3A,MAP1LC3B,SQSTM1
Chronic Myeloid Leukemia Signaling	1.7	0.126	#NUM!	BCL2L1,CBLC,CCND1,CDK4,CDKN1A,HRAS,MDM2,PA2G4,RALA,RAP1A,RAP1B,RELA,RRAS
MIF Regulation of Innate Immunity	1.69	0.167	1.89	CD14,CD74,MIF,NFKBIA,NFKBIB,PLA2G1B,RELA
Pyrimidine Ribonucleotides Interconversion	1.69	0.167	1.134	AK1,CMPK1,CTPS1,DDX3X,ENTPD1,NME1,NUDT18
P2Y Purigenic Receptor Signaling Pathway	1.64	0.118	3.207	CREB3,GNAI2,GNB1,GNB2,GNG5,HRAS,PDIA3,PRKAR1A,PRKAR2A,PRKCI,RALA,RAP1A,RAP1B,RELA,RRAS
B Cell Receptor Signaling	1.63	0.108	4.025	BCL10,BCL2L1,Calm1 (includes others),CAMK2D,CFL1,CFL2,CREB3,EGR1,HRAS,MAP2K3,MAPK13,NFKBIA,NFKBIB,PPP3CA,RAC1,RALA,RAP1A,RAP1B,RELA,RRAS
Natural Killer Cell Signaling	1.63	0.107	2.4	B2M,CFL1,CFL2,HLA-A,HLA-E,HRAS,HSPA1A/HSPA1B,HSPA4,HSPA8,IL18R1,ITGB1,MAP2K3,MAPK13,NECTIN2,RAC1,RALA,RAP1A,RAP1B,RELA,ROCK1,RRAS
TR/RXR Activation	1.62	0.131	#NUM!	ACACA,ENO1,FASN,HIF1A,HP,LDLR,MDM2,ME1,SREBF1,SREBF2,UCP2
HER-2 Signaling in Breast Cancer	1.62	0.131	#NUM!	AREG,CCND1,CDKN1A,HRAS,ITGB1,MDM2,PRKCI,RALA,RAP1A,RAP1B,RRAS
Hepatic Fibrosis / Hepatic Stellate Cell Activation	1.61	0.108	#NUM!	BAMBI,BAX,CD14,COL4A1,COL4A2,COL4A4,FGFR2,ICAM1,IFNGR2,IL4R,KLF6,LBP,MET,MYH14,MYH9,MYL6,PDGFA,RELA,TIMP2,VEGFA
Heme Degradation	1.61	0.5	#NUM!	BLVRB,HMOX2
Glutathione Redox Reactions II	1.61	0.5	#NUM!	GSR,PDIA3
Pyrimidine Ribonucleotides De Novo Biosynthesis	1.59	0.159	1.134	AK1,CMPK1,CTPS1,DDX3X,ENTPD1,NME1,NUDT18
IL-4 Signaling	1.58	0.129	#NUM!	HLA-A,HLA-DMB,HLA-DQA1,HLA-DQB1,HLA-DRB5,HRAS,IL4R,RALA,RAP1A,RAP1B,RRAS
Xenobiotic Metabolism AHR Signaling Pathway	1.58	0.129	0.905	GSTA3,GSTM5,GSTP1,HSP90AA1,HSP90AB1,MGST1,MGST3,PON1,PTGES3,RELA,SUMO1
Telomerase Signaling	1.58	0.121	1.265	CDKN1A,HRAS,HSP90AA1,HSP90AB1,PPP2CA,PPP2CB,PPP2R1A,PTGES3,RALA,RAP1A,RAP1B,RRAS,TPP1
Nucleotide Excision Repair Pathway	1.57	0.171	#NUM!	GTF2H5,POLR2C,POLR2F,POLR2G,POLR2J,POLR2L
HMGB1 Signaling	1.55	0.109	4	AGER,Cdc42,HRAS,ICAM1,IFNGR2,IL33,MAP2K3,MAPK13,RAC1,RALA,RAP1A,RAP1B,RBBP7,RELA,RHOA,RHOC,RHOD,RRAS
Cholecystokinin/Gastrin-mediated Signaling	1.55	0.118	2.887	Cdc42,HRAS,IL33,MAP2K3,PRKCI,RAC1,RALA,RAP1A,RAP1B,RHOA,RHOC,RHOD,ROCK1,RRAS
Cellular Effects of Sildenafil (Viagra)	1.54	0.115	#NUM!	ACTB,ACTG1,Calm1 (includes others),GNAS,MPRIP,MYH14,MYH9,MYL12A,MYL12B,MYL6,PDIA3,PPP1CB,PPP1R12A,PRKAR1A,PRKAR2A
Erythropoietin Signaling	1.53	0.132	#NUM!	HRAS,NFKBIA,NFKBIB,PRKCI,RALA,RAP1A,RAP1B,RELA,RRAS,SOCS3
Toll-like Receptor Signaling	1.53	0.132	0.816	CD14,IL33,LBP,MAP2K3,MAPK13,NFKBIA,RELA,TRAF4,Ubb,UBC
Endocannabinoid Cancer Inhibition Pathway	1.52	0.112	-1.5	ATF3,CCND1,CCND2,CCND3,CDKN1A,CREB3,CTNNB1,GNAI2,HIF1A,MAP2K3,NUPR1,PRKAR1A,PRKAR2A,RHOA,ROCK1,VEGFA
Xenobiotic Metabolism General Signaling Pathway	1.52	0.112	4	FTL,GCLC,GSTA3,GSTM5,GSTP1,HRAS,MAP2K3,MAPK13,MGST1,MGST3,NFE2L2,PRKCI,RALA,RAP1A,RAP1B,RRAS
PKCθ Signaling in T Lymphocytes	1.51	0.11	4.123	BCL10,CAMK2D,HLA-A,HLA-DMB,HLA-DQA1,HLA-DQB1,HLA-DRB5,HRAS,NFKBIA,NFKBIB,PPP3CA,RAC1,RALA,RAP1A,RAP1B,RELA,RRAS
Antiproliferative Role of Somatostatin Receptor 2	1.49	0.13	2.121	CDKN1A,GNB1,GNB2,GNG5,HRAS,NT5C,RALA,RAP1A,RAP1B,RRAS
γ-glutamyl Cycle	1.48	0.273	#NUM!	ANPEP,GCLC,GCLM
Purine Nucleotides De Novo Biosynthesis II	1.48	0.273	#NUM!	ADSS2,IMPDH2,PAICS
Cell Cycle: G1/S Checkpoint Regulation	1.47	0.134	-1.134	CCND1,CCND2,CCND3,CDK4,CDKN1A,MDM2,PA2G4,RPL11,SKP1
CTLA4 Signaling in Cytotoxic T Lymphocytes	1.45	0.124	#NUM!	AP1S1,AP2M1,AP2S1,B2M,CLTA,CLTB,HLA-A,HLA-E,PPP2CA,PPP2CB,PPP2R1A
Ephrin A Signaling	1.45	0.149	#NUM!	CFL1,CFL2,EFNA1,EPHA2,RAC1,RHOA,ROCK1
OX40 Signaling Pathway	1.42	0.122	0	B2M,BCL2L1,HLA-A,HLA-DMB,HLA-DQA1,HLA-DQB1,HLA-DRB5,HLA-E,NFKBIA,NFKBIB,RELA
Trans, trans-farnesyl Diphosphate Biosynthesis	1.41	0.4	#NUM!	FDPS,IDI1
Graft-versus-Host Disease Signaling	1.4	0.146	#NUM!	HLA-A,HLA-DMB,HLA-DQA1,HLA-DQB1,HLA-DRB5,HLA-E,IL33
HOTAIR Regulatory Pathway	1.4	0.106	1	ATG3,CD44,CDKN1A,CTNNB1,EED,H3-3A/H3-3B,ICAM1,IRF1,LAMTOR5,MDM2,MET,NFKBIA,RBBP4,RBBP7,RELA,RHOC,ROCK1
Death Receptor Signaling	1.39	0.121	1.508	ACTB,ACTG1,CYCS,DIABLO,HSPB1,LMNA,NFKBIA,NFKBIB,RELA,ROCK1,SPTAN1
Role of MAPK Signaling in the Pathogenesis of Influenza	1.39	0.125	#NUM!	BAX,HRAS,MAP2K3,MAPK13,PLA2G1B,PLAAT3,RALA,RAP1A,RAP1B,RRAS
Cyclins and Cell Cycle Regulation	1.36	0.123	0	CCND1,CCND2,CCND3,CDK4,CDKN1A,PA2G4,PPP2CA,PPP2CB,PPP2R1A,SKP1
Small Cell Lung Cancer Signaling	1.33	0.127	1.633	BCL2L1,CCND1,CDK4,CYCS,NFKBIA,NFKBIB,PA2G4,RELA,TRAF4
Myc Mediated Apoptosis Signaling	1.32	0.14	0.378	BAX,BCL2L1,CYCS,MCL1,MDM2,PRKAR1A,PRKAR2A
Amyloid Processing	1.32	0.14	1	CAPN2,CAPNS1,CSNK2B,MAPK13,PRKAR1A,PRKAR2A,PSENEN
T Cell Receptor Signaling	1.32	0.114	#NUM!	BCL10,Calm1 (includes others),HRAS,NFKBIA,PPP3CA,RAC1,RALA,RAP1A,RAP1B,RELA,RRAS,SHB
Tec Kinase Signaling	1.32	0.104	2.714	ACTB,ACTG1,Cdc42,GNAI2,GNAS,GNB1,GNB2,GNG5,GTF2I,ITGA3,ITGB1,PRKCI,RAC1,RELA,RHOA,RHOC,RHOD
Xenobiotic Metabolism CAR Signaling Pathway	1.3	0.101	2.982	CITED2,CYP2B6,GSTA3,GSTM5,GSTP1,HS2ST1,HSP90AA1,HSP90AB1,MAP2K3,MGST1,MGST3,PPP2CA,PPP2CB,PPP2R1A,PRKCI,RACK1,SCAND1,SNW1,SRA1
Glioblastoma Multiforme Signaling	1.3	0.103	2.84	CCND1,Cdc42,CDK4,CDKN1A,CTNNB1,HRAS,MDM2,PDGFA,PDIA3,RAC1,RALA,RAP1A,RAP1B,RHOA,RHOC,RHOD,RRAS
PPARα/RXRα Activation	1.28	0.1	-1	ACADL,ADIPOR1,FASN,GNAS,HRAS,HSP90AA1,HSP90AB1,LPL,MAP2K3,NFKBIA,NFKBIB,PDIA3,PRKAR1A,PRKAR2A,RALA,RAP1A,RAP1B,RELA,RRAS
UVC-Induced MAPK Signaling	1.28	0.137	2.646	HRAS,MAPK13,PRKCI,RALA,RAP1A,RAP1B,RRAS
Gα12/13 Signaling	1.28	0.108	2.887	CTNNB1,HRAS,MYL12A,MYL12B,MYL6,NFKBIA,NFKBIB,RALA,RAP1A,RAP1B,RELA,RHOA,ROCK1,RRAS
T Helper Cell Differentiation	1.27	0.123	#NUM!	HLA-A,HLA-DMB,HLA-DQA1,HLA-DQB1,HLA-DRB5,IFNGR2,IL10RB,IL18R1,IL4R
Non-Small Cell Lung Cancer Signaling	1.27	0.123	2.646	CCND1,CDK4,HRAS,PA2G4,RALA,RAP1A,RAP1B,RASSF1,RRAS
Methionine Degradation I (to Homocysteine)	1.25	0.182	0	AHCYL2,MAT2B,PRMT1,PRMT8
GDP-mannose Biosynthesis	1.25	0.333	#NUM!	GPI,PMM1
BMP signaling pathway	1.24	0.118	3.162	BMP4,HRAS,MAPK13,PRKAR1A,PRKAR2A,RALA,RAP1A,RAP1B,RELA,RRAS
Estrogen-Dependent Breast Cancer Signaling	1.24	0.122	2.828	CCND1,CREB3,HRAS,HSD17B11,RALA,RAP1A,RAP1B,RELA,RRAS
Agranulocyte Adhesion and Diapedesis	1.23	0.0984	#NUM!	ACTB,ACTG1,C5,CLDN18,CLDN3,CLDN7,Cxcl15,CXCL16,CXCL17,EZR,GNAI2,ICAM1,IL33,ITGA3,ITGB1,MSN,MYH14,MYH9,MYL6
Amyotrophic Lateral Sclerosis Signaling	1.23	0.113	1.508	BAX,BCL2L1,CAPN2,CAPNS1,CAT,CYCS,PPP3CA,RAB5C,RAC1,SSR4,VEGFA
ATM Signaling	1.23	0.113	-1.134	CDKN1A,CREB3,GADD45A,GADD45B,GADD45G,MAPK13,MDM2,NFKBIA,PPP2CA,PPP2CB,PPP2R1A
Pancreatic Adenocarcinoma Signaling	1.22	0.11	2.111	BCL2L1,CCND1,CDK4,CDKN1A,HBEGF,MDM2,PA2G4,RAC1,RALA,RALBP1,RELA,VEGFA
Corticotropin Releasing Hormone Signaling	1.21	0.103	2.714	ARPC5,Calm1 (includes others),CREB3,GNAI2,GNAS,JUND,MAPK13,NR4A1,NT5C,PRKAR1A,PRKAR2A,PRKCI,RAP1A,RAP1B,VEGFA
CD27 Signaling in Lymphocytes	1.21	0.132	0.447	BCL2L1,CYCS,MAP2K3,NFKBIA,NFKBIB,RELA,SIVA1
Systemic Lupus Erythematosus In T Cell Signaling Pathway	1.21	0.0898	2.921	B2M,CD44,Cdc42,CREB3,EZR,GADD45A,GNAI2,HLA-A,HLA-DMB,HLA-DQA1,HLA-DQB1,HLA-DRB5,HLA-E,HRAS,MAP2K3,MSN,ORAI1,PPP2CA,PPP2CB,PPP2R1A,PPP3CA,RAC1,RALA,RAP1A,RAP1B,RHOA,RHOC,RHOD,ROCK1,RRAS
Gαq Signaling	1.19	0.101	3.317	Calm1 (includes others),Cdc42,GNAS,GNB1,GNB2,GNG5,NFKBIA,NFKBIB,PPP3CA,PRKCI,RAC1,RELA,RHOA,RHOC,RHOD,ROCK1
Acetyl-CoA Biosynthesis III (from Citrate)	1.17	1	#NUM!	ACLY
Sorbitol Degradation I	1.17	1	#NUM!	SORD
Histamine Biosynthesis	1.17	1	#NUM!	HDC
iCOS-iCOSL Signaling in T Helper Cells	1.17	0.108	3.162	Calm1 (includes others),CAMK2D,HLA-A,HLA-DMB,HLA-DQA1,HLA-DQB1,HLA-DRB5,NFKBIA,NFKBIB,PPP3CA,RAC1,RELA
HGF Signaling	1.17	0.108	2.309	CCND1,CDKN1A,HRAS,ITGA3,ITGB1,MET,PRKCI,RAC1,RALA,RAP1A,RAP1B,RRAS
Adrenomedullin signaling pathway	1.16	0.0964	3.771	BAX,C3,Calm1 (includes others),CEBPB,GNAS,HIF1A,HRAS,IL33,MAP2K3,MAPK13,NT5C,PDIA3,PRKAR1A,PRKAR2A,RALA,RAP1A,RAP1B,RELA,RRAS
Tumoricidal Function of Hepatic Natural Killer Cells	1.14	0.167	#NUM!	BAX,CYCS,ICAM1,SERPINB9
TCA Cycle II (Eukaryotic)	1.14	0.167	2	MDH1,MDH2,SDHB,SDHD
Cysteine Biosynthesis III (mammalia)	1.14	0.167	0	AHCYL2,MAT2B,PRMT1,PRMT8
Acute Myeloid Leukemia Signaling	1.13	0.112	3	CCND1,CEBPA,HRAS,IDH2,MAP2K3,RALA,RAP1A,RAP1B,RELA,RRAS
Inhibition of Angiogenesis by TSP1	1.13	0.147	2	CD47,MAPK13,SDC1,THBS1,VEGFA
Thioredoxin Pathway	1.12	0.286	#NUM!	TXN,TXNRD1
Aspartate Degradation II	1.12	0.286	#NUM!	MDH1,MDH2
Gαi Signaling	1.12	0.104	1.732	GNAI2,GNAS,GNB1,GNB2,GNG5,HRAS,PRKAR1A,PRKAR2A,RALA,RAP1A,RAP1B,RAP1GAP,RRAS
NGF Signaling	1.1	0.105	3.162	BAX,CREB3,HRAS,RAC1,RALA,RAP1A,RAP1B,RELA,RHOA,ROCK1,RRAS,TRAF4
Regulation Of The Epithelial Mesenchymal Transition By Growth Factors Pathway	1.1	0.0957	1.886	CLDN3,EGR1,FGFR2,HRAS,ID2,MAP2K3,MAPK13,MET,OCLN,PDGFA,RAC1,RALA,RAP1A,RAP1B,RELA,RHOA,RRAS,WWTR1
DNA Methylation and Transcriptional Repression Signaling	1.09	0.143	#NUM!	CHD3,H3-3A/H3-3B,RBBP4,RBBP7,SAP18
TWEAK Signaling	1.09	0.143	0.447	CYCS,NFKBIA,NFKBIB,RELA,TNFRSF12A
IL-17A Signaling in Fibroblasts	1.09	0.143	#NUM!	CEBPB,MAPK13,NFKBIA,NFKBIB,RELA
Ovarian Cancer Signaling	1.08	0.101	3	CCND1,CD44,CDK4,CTNNB1,HRAS,PA2G4,PRKAR1A,PRKAR2A,PTGS1,RALA,RAP1A,RAP1B,RRAS,VEGFA
Atherosclerosis Signaling	1.08	0.102	#NUM!	APOE,CLU,F3,ICAM1,IL33,LPL,LYZ,PDGFA,PLA2G1B,PLAAT3,PON1,RELA,TNFRSF12A
Apelin Endothelial Signaling Pathway	1.08	0.104	3.464	Calm1 (includes others),GNAI2,GNAS,HIF1A,HRAS,ICAM1,PRKCI,RALA,RAP1A,RAP1B,RELA,RRAS
PFKFB4 Signaling Pathway	1.07	0.13	1.342	CREB3,GNAS,GPI,MAP2K3,PRKAR1A,PRKAR2A
IL-17 Signaling	1.06	0.113	#NUM!	CEBPB,HRAS,MAP2K3,MAPK13,RALA,RAP1A,RAP1B,RELA,RRAS
Parkinson's Signaling	1.06	0.188	#NUM!	CYCS,MAPK13,PARK7
B Cell Development	1.05	0.139	#NUM!	HLA-A,HLA-DMB,HLA-DQA1,HLA-DQB1,HLA-DRB5
Cancer Drug Resistance By Drug Efflux	1.04	0.121	#NUM!	HRAS,MDM2,RALA,RAP1A,RAP1B,RRAS,YBX1
Prolactin Signaling	1.04	0.111	2.121	CEBPB,HRAS,IRF1,PRKCI,RALA,RAP1A,RAP1B,RRAS,SOCS3
Triacylglycerol Degradation	1.04	0.128	-0.816	AARS1,ABHD2,CES1,LPL,MGLL,PRDX6
D-myo-inositol (1,4,5,6)-Tetrakisphosphate Biosynthesis	1.03	0.0986	3.207	ACP1,DUSP1,HACD2,NT5C,NUDT14,PPP1CA,Ppp1cc,PPP1R12A,PPP1R14B,PPP3CA,PPP4C,PTPRF,SET,SOCS3
D-myo-inositol (3,4,5,6)-tetrakisphosphate Biosynthesis	1.03	0.0986	3.207	ACP1,DUSP1,HACD2,NT5C,NUDT14,PPP1CA,Ppp1cc,PPP1R12A,PPP1R14B,PPP3CA,PPP4C,PTPRF,SET,SOCS3
Sphingosine and Sphingosine-1-phosphate Metabolism	1.02	0.25	#NUM!	ASAH1,SGPP2
ErbB Signaling	1.01	0.106	3.162	AREG,HBEGF,HRAS,MAP2K3,MAPK13,PRKCI,RALA,RAP1A,RAP1B,RRAS
Stearate Biosynthesis I (Animals)	1	0.125	-1.633	ACOT7,ACOT9,ACSL4,DHCR24,ELOVL1,FASN
γ-linolenate Biosynthesis II (Animals)	0.996	0.176	#NUM!	ACSL4,CYB5A,FADS1
Autoimmune Thyroid Disease Signaling	0.971	0.122	#NUM!	HLA-A,HLA-DMB,HLA-DQA1,HLA-DQB1,HLA-DRB5,HLA-E
Melatonin Signaling	0.967	0.111	2.121	Calm1 (includes others),CAMK2D,GNAI2,MAP2K3,PDIA3,PRKAR1A,PRKAR2A,PRKCI
VEGF Family Ligand-Receptor Interactions	0.963	0.107	2.121	HRAS,NRP1,PLA2G1B,PRKCI,RALA,RAP1A,RAP1B,RRAS,VEGFA
Th1 Pathway	0.955	0.0992	1.897	HLA-A,HLA-DMB,HLA-DQA1,HLA-DQB1,HLA-DRB5,ICAM1,IFNGR2,IL10RB,IL18R1,IRF1,PSENEN,SOCS3
Colorectal Cancer Metastasis Signaling	0.9	0.087	3.578	BAX,BCL2L1,CCND1,Cdc42,CTNNB1,GNAS,GNB1,GNB2,GNG5,HRAS,PRKAR1A,PRKAR2A,RAC1,RALA,RAP1A,RAP1B,RELA,RHOA,RHOC,RHOD,RRAS,VEGFA
Role of NFAT in Cardiac Hypertrophy	0.896	0.0888	3.771	Calm1 (includes others),CAMK2D,GNAI2,GNAS,GNB1,GNB2,GNG5,HRAS,MAP2K3,MAPK13,PDIA3,PPP3CA,PRKAR1A,PRKAR2A,PRKCI,RALA,RAP1A,RAP1B,RRAS
T Cell Exhaustion Signaling Pathway	0.896	0.0914	2.236	HLA-A,HLA-DMB,HLA-DQA1,HLA-DQB1,HLA-DRB5,HLA-E,HRAS,IL10RB,PPP2CA,PPP2CB,PPP2R1A,RALA,RAP1A,RAP1B,RRAS,VEGFA
IL-15 Signaling	0.893	0.107	2.828	BCL2L1,HRAS,MAPK13,RALA,RAP1A,RAP1B,RELA,RRAS
Angiopoietin Signaling	0.893	0.107	1.414	HRAS,NFKBIA,NFKBIB,RALA,RAP1A,RAP1B,RELA,RRAS
Guanine and Guanosine Salvage I	0.889	0.5	#NUM!	HPRT1
Alanine Degradation III	0.889	0.5	#NUM!	GPT
Flavin Biosynthesis IV (Mammalian)	0.889	0.5	#NUM!	RFK
Alanine Biosynthesis II	0.889	0.5	#NUM!	GPT
Palmitate Biosynthesis I (Animals)	0.889	0.5	#NUM!	FASN
Fatty Acid Biosynthesis Initiation II	0.889	0.5	#NUM!	FASN
Adenine and Adenosine Salvage I	0.889	0.5	#NUM!	APRT
Relaxin Signaling	0.886	0.0933	2.111	GNAI2,GNAS,GNB1,GNB2,GNG5,NFKBIA,NFKBIB,NT5C,PRKAR1A,PRKAR2A,RAP1A,RAP1B,RELA,VEGFA
Granzyme A Signaling	0.886	0.158	#NUM!	H1-2,NME1,SET
Crosstalk between Dendritic Cells and Natural Killer Cells	0.851	0.101	2.236	ACTB,ACTG1,CAMK2D,HLA-A,HLA-DRB5,HLA-E,NECTIN2,RELA,TLN1
Prostanoid Biosynthesis	0.851	0.2	#NUM!	PTGES3,PTGS1
Lymphotoxin β Receptor Signaling	0.848	0.113	1	BCL2L1,CYCS,DIABLO,NFKBIA,RELA,TRAF4
PXR/RXR Activation	0.845	0.108	#NUM!	ALAS1,Aldh1a7,CYP2B6,PRKAR1A,PRKAR2A,RELA,SCD
CD40 Signaling	0.845	0.108	0.816	ICAM1,MAP2K3,MAPK13,NFKBIA,NFKBIB,PTGS1,RELA
SAPK/JNK Signaling	0.839	0.098	2.53	GADD45A,GNB1,GNG5,HNRNPK,HRAS,RAC1,RALA,RAP1A,RAP1B,RRAS
3-phosphoinositide Biosynthesis	0.836	0.0904	3.357	ACP1,CDIPT,DUSP1,HACD2,NT5C,NUDT14,PPP1CA,Ppp1cc,PPP1R12A,PPP1R14B,PPP3CA,PPP4C,PTPRF,SET,SOCS3
G Protein Signaling Mediated by Tubby	0.824	0.129	#NUM!	GNAS,GNB1,GNB2,GNG5
Mitotic Roles of Polo-Like Kinase	0.821	0.106	#NUM!	ANAPC11,HSP90AA1,HSP90AB1,PLK2,PPP2CA,PPP2CB,PPP2R1A
Mouse Embryonic Stem Cell Pluripotency	0.821	0.0971	1.897	BMP4,CTNNB1,HRAS,ID1,ID2,MAPK13,RALA,RAP1A,RAP1B,RRAS
IL-3 Signaling	0.801	0.101	2.828	HRAS,PPP3CA,PRKCI,RAC1,RALA,RAP1A,RAP1B,RRAS
ErbB4 Signaling	0.796	0.104	2.449	HRAS,PRKCI,PSENEN,RALA,RAP1A,RAP1B,RRAS
3-phosphoinositide Degradation	0.79	0.0897	3.207	ACP1,DUSP1,HACD2,NT5C,NUDT14,PPP1CA,Ppp1cc,PPP1R12A,PPP1R14B,PPP3CA,PPP4C,PTPRF,SET,SOCS3
4-1BB Signaling in T Lymphocytes	0.788	0.125	#NUM!	MAPK13,NFKBIA,NFKBIB,RELA
Fatty Acid β-oxidation I	0.788	0.125	-1	ACSL4,ECHS1,ECI2,SCP2
Ketogenesis	0.783	0.182	#NUM!	ACAT2,HMGCS1
FLT3 Signaling in Hematopoietic Progenitor Cells	0.78	0.1	2.828	CREB3,EIF4E,HRAS,MAPK13,RALA,RAP1A,RAP1B,RRAS
Renin-Angiotensin Signaling	0.777	0.0932	3.317	HRAS,MAPK13,PRKAR1A,PRKAR2A,PRKCI,RAC1,RALA,RAP1A,RAP1B,RELA,RRAS
D-myo-inositol-5-phosphate Metabolism	0.777	0.0892	3.207	ACP1,DUSP1,HACD2,NT5C,NUDT14,PPP1CA,Ppp1cc,PPP1R12A,PPP1R14B,PPP3CA,PPP4C,PTPRF,SET,SOCS3
PD-1, PD-L1 cancer immunotherapy pathway	0.764	0.0943	-2.53	B2M,BCL2L1,CSNK2B,HLA-A,HLA-DMB,HLA-DQA1,HLA-DQB1,HLA-DRB5,HLA-E,IFNGR2
Osteoarthritis Pathway	0.762	0.0853	0.535	AGER,ANXA2,ANXA5,CEBPB,CREB3,CTNNA1,CTNNB1,DDIT4,EPAS1,HES1,HIF1A,ITGA3,ITGB1,RAC1,RELA,SLC39A8,TIMP3,VEGFA
Melanocyte Development and Pigmentation Signaling	0.752	0.0957	3	CREB3,GNAS,HRAS,PRKAR1A,PRKAR2A,RALA,RAP1A,RAP1B,RRAS
Role of JAK1 and JAK3 in γc Cytokine Signaling	0.75	0.101	#NUM!	HRAS,IL4R,RALA,RAP1A,RAP1B,RRAS,SOCS3
SPINK1 General Cancer Pathway	0.75	0.101	1.134	HRAS,Mt1,Mt2,RALA,RAP1A,RAP1B,RRAS
Pyrimidine Deoxyribonucleotides De Novo Biosynthesis I	0.747	0.136	#NUM!	AK1,CMPK1,NME1
Diphthamide Biosynthesis	0.726	0.333	#NUM!	EEF2
NADH Repair	0.726	0.333	#NUM!	GAPDH
Inosine-5'-phosphate Biosynthesis II	0.726	0.333	#NUM!	PAICS
Hypusine Biosynthesis	0.726	0.333	#NUM!	EIF5A
Biotin-carboxyl Carrier Protein Assembly	0.726	0.333	#NUM!	ACACA
Thyroid Hormone Biosynthesis	0.726	0.333	#NUM!	CTSD
S-adenosyl-L-methionine Biosynthesis	0.726	0.333	#NUM!	MAT2B
Cytotoxic T Lymphocyte-mediated Apoptosis of Target Cells	0.721	0.118	#NUM!	B2M,CYCS,HLA-A,HLA-E
Assembly of RNA Polymerase I Complex	0.721	0.167	#NUM!	POLR1D,POLR2F
FAT10 Cancer Signaling Pathway	0.717	0.109	0.447	CTNNB1,EEF1A1,MAD2L2,NFKBIA,RELA
TGF-β Signaling	0.714	0.0938	2.828	BMP4,HRAS,MAP2K3,MAPK13,RALA,RAP1A,RAP1B,RRAS,TGIF1
nNOS Signaling in Neurons	0.69	0.106	#NUM!	Calm1 (includes others),CAPN2,CAPNS1,PPP3CA,PRKCI
UVA-Induced MAPK Signaling	0.68	0.0918	2.449	BCL2L1,CYCS,HRAS,MAPK13,PDIA3,RALA,RAP1A,RAP1B,RRAS
PCP pathway	0.674	0.1	2.449	JUNB,JUND,PFN1,RAC1,RHOA,ROCK1
IL-22 Signaling	0.668	0.125	#NUM!	IL10RB,MAPK13,SOCS3
Acyl-CoA Hydrolysis	0.668	0.154	#NUM!	ACOT7,ACOT9
Urate Biosynthesis/Inosine 5'-phosphate Degradation	0.668	0.154	#NUM!	IMPDH2,NT5C
Vitamin-C Transport	0.668	0.125	#NUM!	LRRC8C,TXN,TXNRD1
Regulation of the Epithelial-Mesenchymal Transition Pathway	0.666	0.0833	#NUM!	CLDN3,CTNNB1,EGR1,FGFR2,HIF1A,HRAS,ID2,MAP2K3,MET,PSENEN,RALA,RAP1A,RAP1B,RELA,RHOA,RRAS
PDGF Signaling	0.664	0.093	2.121	ACP1,CSNK2B,HRAS,PDGFA,RALA,RAP1A,RAP1B,RRAS
Apelin Cardiomyocyte Signaling Pathway	0.664	0.0909	2.121	CAT,GNAI2,HIF1A,MAPK13,MYL12A,MYL12B,MYL6,PDIA3,PRKCI
Systemic Lupus Erythematosus In B Cell Signaling Pathway	0.654	0.08	3.838	BCL10,BCL2L1,Calm1 (includes others),CCND1,CCND2,CCND3,CTNNB1,HRAS,IFNGR2,IL33,ISG15,ISG20,MCL1,PPP3CA,PRKCI,RAC1,RALA,RAP1A,RAP1B,RELA,RRAS,TRAF4
FXR/RXR Activation	0.652	0.0873	#NUM!	APOE,C3,CLU,FASN,IL33,ITIH4,LPL,PON1,SDC1,SREBF1,TF
IL-2 Signaling	0.652	0.0984	2.236	CSNK2B,HRAS,RALA,RAP1A,RAP1B,RRAS
Granulocyte Adhesion and Diapedesis	0.648	0.0833	#NUM!	C5,CLDN18,CLDN3,CLDN7,Cxcl15,CXCL16,CXCL17,EZR,GNAI2,ICAM1,IL33,ITGA3,ITGB1,MSN,SDC1
Superpathway of Methionine Degradation	0.633	0.108	0	AHCYL2,MAT2B,PRMT1,PRMT8
Complement System	0.633	0.108	#NUM!	C1QBP,C3,C5,C6
Colanic Acid Building Blocks Biosynthesis	0.62	0.143	#NUM!	GPI,PMM1
PRPP Biosynthesis I	0.616	0.25	#NUM!	PRPS2
Spermine and Spermidine Degradation I	0.616	0.25	#NUM!	SAT1
Acetate Conversion to Acetyl-CoA	0.616	0.25	#NUM!	ACSS1
Fatty Acid β-oxidation III (Unsaturated, Odd Number)	0.616	0.25	#NUM!	ECI2
Thrombopoietin Signaling	0.611	0.0952	2.449	HRAS,PRKCI,RALA,RAP1A,RAP1B,RRAS
Dendritic Cell Maturation	0.611	0.082	3.207	B2M,CREB3,HLA-A,HLA-DMB,HLA-DQA1,HLA-DQB1,HLA-DRB5,HLA-E,ICAM1,IL33,MAPK13,NFKBIA,NFKBIB,PDIA3,RELA
Neurotrophin/TRK Signaling	0.609	0.0921	2.646	CREB3,HRAS,MAP2K3,RALA,RAP1A,RAP1B,RRAS
Estrogen-mediated S-phase Entry	0.6	0.115	#NUM!	CCND1,CDK4,CDKN1A
Th1 and Th2 Activation Pathway	0.592	0.0819	#NUM!	HLA-A,HLA-DMB,HLA-DQA1,HLA-DQB1,HLA-DRB5,ICAM1,IFNGR2,IL10RB,IL18R1,IL33,IL4R,IRF1,PSENEN,SOCS3
Fc Epsilon RI Signaling	0.59	0.0855	2.53	HRAS,MAP2K3,MAPK13,PLA2G1B,PRKCI,RAC1,RALA,RAP1A,RAP1B,RRAS
April Mediated Signaling	0.58	0.103	0	MAPK13,NFKBIA,NFKBIB,RELA
Antiproliferative Role of TOB in T Cell Signaling	0.58	0.103	-1	CDC34,PABPC1,SKP1,TOB1
eNOS Signaling	0.573	0.0818	0.632	AQP5,Calm1 (includes others),GNAS,HSP90AA1,HSP90AB1,HSPA1A/HSPA1B,HSPA4,HSPA8,PRKAR1A,PRKAR2A,PRKCI,STUB1,VEGFA
ErbB2-ErbB3 Signaling	0.572	0.0923	2.449	CCND1,HRAS,RALA,RAP1A,RAP1B,RRAS
GP6 Signaling Pathway	0.562	0.084	3.162	Calm1 (includes others),COL4A1,COL4A2,COL4A4,LAMA5,LAMC2,PRKCI,RAC1,RAP1B,TLN1
Thyroid Cancer Signaling	0.558	0.0886	1.89	CCND1,CTNNB1,HRAS,RALA,RAP1A,RAP1B,RRAS
Synaptic Long Term Depression	0.547	0.0794	1.604	GNAI2,GNAS,HRAS,NT5C,PDIA3,PLA2G1B,PLAAT3,PPP2CA,PPP2CB,PPP2R1A,PRKCI,RALA,RAP1A,RAP1B,RRAS
Glutaryl-CoA Degradation	0.536	0.125	#NUM!	ACAT2,PARK7
Isoleucine Degradation I	0.536	0.125	#NUM!	ACAT2,ECHS1
CCR5 Signaling in Macrophages	0.533	0.0851	2.236	Calm1 (includes others),GNAI2,GNAS,GNB1,GNB2,GNG5,MAPK13,PRKCI
Creatine-phosphate Biosynthesis	0.533	0.2	#NUM!	CKMT1A/CKMT1B
Tetrapyrrole Biosynthesis II	0.533	0.2	#NUM!	ALAS1
CMP-N-acetylneuraminate Biosynthesis I (Eukaryotes)	0.533	0.2	#NUM!	NANS
Eumelanin Biosynthesis	0.533	0.2	#NUM!	MIF
B Cell Activating Factor Signaling	0.532	0.0976	#NUM!	MAPK13,NFKBIA,NFKBIB,RELA
Role of IL-17A in Arthritis	0.532	0.0926	#NUM!	MAP2K3,MAPK13,NFKBIA,NFKBIB,RELA
Nur77 Signaling in T Lymphocytes	0.519	0.0882	0.816	Calm1 (includes others),CYCS,NR4A1,PPP3CA,PRKCI,SIN3B
Calcium Signaling	0.516	0.0777	2.828	Calm1 (includes others),CALR,CAMK2D,CREB3,MICU1,MYH14,MYH9,MYL6,PPP3CA,PRKAR1A,PRKAR2A,RAP1A,RAP1B,Tpm1,TPM3,Tpm4
Antioxidant Action of Vitamin C	0.513	0.0826	-1.89	MAPK13,NFKBIA,NFKBIB,PDIA3,PLA2G1B,PLAAT3,RELA,TXN,TXNRD1
Role of p14/p19ARF in Tumor Suppression	0.513	0.103	#NUM!	MDM2,NPM1,RAC1
Retinol Biosynthesis	0.51	0.0952	#NUM!	AKR1B10,CES1,ESD,LPL
NF-κB Signaling	0.506	0.0782	1.604	BCL10,BMP4,CSNK2B,FGFR2,HRAS,IL33,NFKBIA,NFKBIB,RALA,RAP1A,RAP1B,RELA,RRAS,UBE2N
RAN Signaling	0.499	0.118	#NUM!	RAN,RANBP1
TNFR2 Signaling	0.488	0.1	#NUM!	NFKBIA,NFKBIB,RELA
LPS/IL-1 Mediated Inhibition of RXR Function	0.48	0.0759	0.816	ACSL4,ALAS1,APOE,CAT,CD14,CYP2B6,FABP5,GSTA3,GSTM5,GSTP1,HMGCS1,HS2ST1,IL33,LBP,MGST1,MGST3,SREBF1
FGF Signaling	0.48	0.0833	1.134	CREB3,FGFR2,HRAS,MAP2K3,MAPK13,MET,RAC1
CNTF Signaling	0.476	0.0877	2.236	HRAS,RALA,RAP1A,RAP1B,RRAS
Pyruvate Fermentation to Lactate	0.469	0.167	#NUM!	LDHA
Chondroitin and Dermatan Biosynthesis	0.469	0.167	#NUM!	CHSY1
Pentose Phosphate Pathway (Non-oxidative Branch)	0.469	0.167	#NUM!	TALDO1
UDP-N-acetyl-D-glucosamine Biosynthesis II	0.469	0.167	#NUM!	GFPT1
Adenine and Adenosine Salvage III	0.469	0.167	#NUM!	HPRT1
Ceramide Degradation	0.469	0.167	#NUM!	ASAH1
Rapoport-Luebering Glycolytic Shunt	0.469	0.167	#NUM!	PGAM1
Lactose Degradation III	0.469	0.167	#NUM!	PSAP
IL-23 Signaling Pathway	0.469	0.0909	0	HIF1A,NFKBIA,RELA,SOCS3
Purine Nucleotides Degradation II (Aerobic)	0.466	0.111	#NUM!	IMPDH2,NT5C
Allograft Rejection Signaling	0.452	0.0814	#NUM!	B2M,HLA-A,HLA-DMB,HLA-DQA1,HLA-DQB1,HLA-DRB5,HLA-E
Neuroinflammation Signaling Pathway	0.451	0.0736	2.4	AGER,B2M,BIRC6,CD200,CREB3,CTNNB1,HLA-A,HLA-DMB,HLA-DQA1,HLA-DQB1,HLA-DRB5,HLA-E,ICAM1,IFNGR2,MAPK13,MFGE8,NFE2L2,PLA2G1B,PPP3CA,PSENEN,RELA,S100G
Superpathway of Inositol Phosphate Compounds	0.45	0.0754	3.357	ACP1,CDIPT,DUSP1,HACD2,NT5C,NUDT14,PPP1CA,Ppp1cc,PPP1R12A,PPP1R14B,PPP3CA,PPP4C,PTPRF,SET,SOCS3
Ethanol Degradation II	0.44	0.0938	#NUM!	ACSS1,ADH5,AKR1A1
Methylglyoxal Degradation III	0.435	0.105	#NUM!	AKR1A1,AKR1B10
Wnt/β-catenin Signaling	0.427	0.0751	-0.333	CCND1,CD44,CSNK2B,CTNNB1,ILK,MDM2,PIN1,PPP2CA,PPP2CB,PPP2R1A,SOX4,Ubb,UBC
RANK Signaling in Osteoclasts	0.426	0.0795	2.236	Calm1 (includes others),GSN,MAPK13,NFKBIA,NFKBIB,PPP3CA,RELA
IL-9 Signaling	0.418	0.0909	#NUM!	CISH,RELA,SOCS3
Sphingosine-1-phosphate Signaling	0.417	0.0769	2.646	ASAH1,Cdc42,GNAI2,PDGFA,PDIA3,RAC1,RHOA,RHOC,RHOD
Phosphatidylcholine Biosynthesis I	0.416	0.143	#NUM!	CHKA
IL-12 Signaling and Production in Macrophages	0.409	0.0758	#NUM!	APOE,CEBPB,CLU,IRF1,LYZ,MAPK13,NFKBIB,PON1,PRKCI,RELA
p38 MAPK Signaling	0.406	0.0763	1	CREB3,DUSP1,H3-3A/H3-3B,HMGN1,HSPB1,IL33,MAP2K3,MAPK13,PLA2G1B
Altered T Cell and B Cell Signaling in Rheumatoid Arthritis	0.4	0.0778	#NUM!	HLA-A,HLA-DMB,HLA-DQA1,HLA-DQB1,HLA-DRB5,IL33,RELA
GDNF Family Ligand-Receptor Interactions	0.398	0.0789	2.449	HRAS,RAC1,RALA,RAP1A,RAP1B,RRAS
Activation of IRF by Cytosolic Pattern Recognition Receptors	0.382	0.0794	-0.447	ISG15,NFKBIA,NFKBIB,PIN1,RELA
Endoplasmic Reticulum Stress Pathway	0.382	0.0952	#NUM!	CALR,EIF2S1
IL-7 Signaling Pathway	0.373	0.0769	0.816	BAX,CCND1,CCND3,MAPK13,MCL1,MET
Superoxide Radicals Degradation	0.371	0.125	#NUM!	CAT
Salvage Pathways of Pyrimidine Deoxyribonucleotides	0.371	0.125	#NUM!	APOBEC3B
Gαs Signaling	0.371	0.0748	2.646	CREB3,GNAS,GNB1,GNB2,GNG5,PRKAR1A,PRKAR2A,RAP1A
Th2 Pathway	0.37	0.0735	#NUM!	HLA-A,HLA-DMB,HLA-DQA1,HLA-DQB1,HLA-DRB5,ICAM1,IL33,IL4R,PSENEN,SOCS3
Breast Cancer Regulation by Stathmin1	0.368	0.0694	#NUM!	ADGRF5,CAMK2D,CCND1,CCND2,CCND3,CDK4,CREB3,GNB1,GNB2,GNG5,GPRC5A,HIF1A,HRAS,PPP1CA,PPP1CB,PPP1R11,PPP1R12A,PPP1R14B,PPP1R14C,PPP2CA,PPP2CB,PPP2R1A,PPP4C,PRKAR1A,PRKAR2A,PRKCI,RAC1,RALA,RAP1A,RAP1B,RHOA,RRAS,SIVA1,TSG101,TUBA1A,TUBA1B,TUBA1C,TUBB,TUBB2A,TUBB4B,VEGFA
TNFR1 Signaling	0.364	0.08	2	CYCS,NFKBIA,NFKBIB,RELA
Phagosome Formation	0.337	0.072	#NUM!	Cdc42,ITGA3,ITGB1,PDIA3,PRKCI,RAC1,RHOA,RHOC,RHOD
Tryptophan Degradation III (Eukaryotic)	0.335	0.087	#NUM!	ACAT2,PARK7
Ethanol Degradation IV	0.335	0.087	#NUM!	ACSS1,CAT
UVB-Induced MAPK Signaling	0.334	0.0769	#NUM!	EIF4E,H3-3A/H3-3B,MAPK13,PRKCI
Heme Biosynthesis II	0.333	0.111	#NUM!	ALAS1
Docosahexaenoic Acid (DHA) Signaling	0.326	0.0789	#NUM!	BAX,BCL2L1,CYCS
Role of JAK1, JAK2 and TYK2 in Interferon Signaling	0.315	0.0833	#NUM!	IFNGR2,RELA
Salvage Pathways of Pyrimidine Ribonucleotides	0.313	0.0714	1.89	AK1,APOBEC3B,CDK4,CMPK1,DAPK1,MAP2K3,NME1
Endocannabinoid Neuronal Synapse Pathway	0.311	0.0703	1.414	GNAI2,GNB1,GNG5,MAPK13,MGLL,PDIA3,PPP3CA,PRKAR1A,PRKAR2A
Inhibition of Matrix Metalloproteases	0.31	0.0769	#NUM!	SDC1,TIMP2,TIMP3
Endothelin-1 Signaling	0.307	0.0691	2.496	GNAI2,GNAS,HRAS,MAPK13,PDIA3,PLA2G1B,PLAAT3,PRKCI,PTGS1,RALA,RAP1A,RAP1B,RRAS
Nitric Oxide Signaling in the Cardiovascular System	0.304	0.0707	2.646	Calm1 (includes others),HSP90AA1,HSP90AB1,PRKAR1A,PRKAR2A,PRKCI,VEGFA
Cardiac Hypertrophy Signaling (Enhanced)	0.304	0.0678	4.95	AKAP13,Calm1 (includes others),CAMK2D,CTNNB1,EIF4E,FGFR2,GNAI2,GNAS,GNB1,GNG5,HRAS,HSPB1,IL10RB,IL18R1,IL33,IL4R,ITGA3,ITGB1,MAP2K3,MAPK13,PDIA3,PPP3CA,PRKAR1A,PRKAR2A,PRKCI,RALA,RAP1A,RAP1B,RELA,RHOA,ROCK1,RPS6,RRAS
White Adipose Tissue Browning Pathway	0.302	0.0698	2.333	CEBPB,CREB3,FGFR2,GNAS,LDHA,MAPK13,PRKAR1A,PRKAR2A,VEGFA
Calcium Transport I	0.301	0.1	#NUM!	ANXA5
Ketolysis	0.301	0.1	#NUM!	ACAT2
Dolichyl-diphosphooligosaccharide Biosynthesis	0.301	0.1	#NUM!	ALG5
IL-17A Signaling in Gastric Cells	0.296	0.08	#NUM!	MAPK13,RELA
Role of JAK family kinases in IL-6-type Cytokine Signaling	0.296	0.08	#NUM!	MAPK13,SOCS3
Bupropion Degradation	0.296	0.08	#NUM!	CYP2B6,CYP51A1
Tryptophan Degradation X (Mammalian, via Tryptamine)	0.296	0.08	#NUM!	AKR1A1,AKR1B10
Neuroprotective Role of THOP1 in Alzheimer's Disease	0.286	0.069	0	HLA-A,HLA-E,MME,PRKAR1A,PRKAR2A,ST14,TPP1,YWHAE
Estrogen Biosynthesis	0.281	0.0732	#NUM!	CYP2B6,CYP51A1,HSD17B11
NAD Salvage Pathway II	0.278	0.0769	#NUM!	ACP1,NT5C
Role of CHK Proteins in Cell Cycle Checkpoint Control	0.271	0.0702	2	CDKN1A,PPP2CA,PPP2CB,PPP2R1A
GPCR-Mediated Integration of Enteroendocrine Signaling Exemplified by an L Cell	0.264	0.0685	0.447	GNAI2,GNAS,PDIA3,PRKAR1A,PRKAR2A
Cleavage and Polyadenylation of Pre-mRNA	0.248	0.0833	#NUM!	NUDT21
Guanosine Nucleotides Degradation III	0.248	0.0833	#NUM!	NT5C
Mineralocorticoid Biosynthesis	0.248	0.0833	#NUM!	EBP
Role of RIG1-like Receptors in Antiviral Innate Immunity	0.243	0.0682	#NUM!	NFKBIA,NFKBIB,RELA
Apelin Pancreas Signaling Pathway	0.243	0.0682	#NUM!	PRKAR1A,PRKAR2A,RELA
Sonic Hedgehog Signaling	0.231	0.069	#NUM!	PRKAR1A,PRKAR2A
Fatty Acid Activation	0.226	0.0769	#NUM!	ACSL4
NAD Phosphorylation and Dephosphorylation	0.226	0.0769	#NUM!	ACP1
Bile Acid Biosynthesis, Neutral Pathway	0.226	0.0769	#NUM!	SCP2
Glucocorticoid Biosynthesis	0.226	0.0769	#NUM!	EBP
UDP-N-acetyl-D-galactosamine Biosynthesis II	0.226	0.0769	#NUM!	GPI
Leukotriene Biosynthesis	0.207	0.0714	#NUM!	MGST3
Circadian Rhythm Signaling	0	0.0606	#NUM!	BHLHE40,CREB3
Coagulation System	0	0.0286	#NUM!	F3
Hepatic Cholestasis	0	0.0595	#NUM!	CD14,IL33,LBP,NFKBIA,NFKBIB,PRKAR1A,PRKAR2A,PRKCI,RELA,SREBF1,TJP2
Role of BRCA1 in DNA Damage Response	0	0.0625	#NUM!	ACTB,BABAM1,CDKN1A,GADD45A,SMARCE1
Role of Pattern Recognition Receptors in Recognition of Bacteria and Viruses	0	0.039	-0.447	C3,C5,EIF2S1,IL33,PRKCI,RELA
TREM1 Signaling	0	0.04	#NUM!	ICAM1,ITGB1,RELA
FcγRIIB Signaling in B Lymphocytes	0	0.0667	2.236	HRAS,RALA,RAP1A,RAP1B,RRAS
Airway Pathology in Chronic Obstructive Pulmonary Disease	0	0.00847	#NUM!	IL33
IL-15 Production	0	0.0579	1.134	EPHA2,FGFR2,IRF1,MAP2K3,MET,PRKCI,RELA
Role of Cytokines in Mediating Communication between Immune Cells	0	0.0185	#NUM!	IL33
Neuropathic Pain Signaling In Dorsal Horn Neurons	0	0.0495	2.236	CAMK2D,PDIA3,PRKAR1A,PRKAR2A,PRKCI
Factors Promoting Cardiogenesis in Vertebrates	0	0.06	2.333	BMP4,CAMK2D,CCND1,CREB3,CTNNB1,PDIA3,PRKCI,RHOA,ROCK1
Cardiomyocyte Differentiation via BMP Receptors	0	0.05	#NUM!	BMP4
Maturity Onset Diabetes of Young (MODY) Signaling	0	0.0508	#NUM!	APOE,GAPDH,UCP2
Human Embryonic Stem Cell Pluripotency	0	0.037	#NUM!	BMP4,CTNNB1,FGFR2,GNAS,PDGFA
Role of Oct4 in Mammalian Embryonic Stem Cell Pluripotency	0	0.0217	#NUM!	SH3GLB1
Role of NANOG in Mammalian Embryonic Stem Cell Pluripotency	0	0.0588	1.633	BMP4,CTNNB1,HRAS,RALA,RAP1A,RAP1B,RRAS
Growth Hormone Signaling	0	0.0423	#NUM!	CEBPA,PRKCI,SOCS3
Basal Cell Carcinoma Signaling	0	0.0278	#NUM!	BMP4,CTNNB1
Primary Immunodeficiency Signaling	0	0.04	#NUM!	TAP1,TAP2
Type II Diabetes Mellitus Signaling	0	0.0634	1.134	ACSL4,ADIPOR1,CEBPB,NFKBIA,NFKBIB,PKM,PRKCI,RELA,SOCS3
Communication between Innate and Adaptive Immune Cells	0	0.0521	#NUM!	B2M,HLA-A,HLA-DRB5,HLA-E,IL33
Retinoic acid Mediated Apoptosis Signaling	0	0.0333	#NUM!	CYCS,IRF1
Role of Osteoblasts, Osteoclasts and Chondrocytes in Rheumatoid Arthritis	0	0.0591	#NUM!	BMP4,Calm1 (includes others),CTNNB1,GSN,IL18R1,IL33,ITGA3,ITGB1,MAP2K3,NFKBIA,NFKBIB,PPP3CA,RELA
Leptin Signaling in Obesity	0	0.0541	#NUM!	PDIA3,PRKAR1A,PRKAR2A,SOCS3
Granzyme B Signaling	0	0.0625	#NUM!	CYCS
Role of Wnt/GSK-3β Signaling in the Pathogenesis of Influenza	0	0.0128	#NUM!	CTNNB1
Role of Lipids/Lipid Rafts in the Pathogenesis of Influenza	0	0.0435	#NUM!	FDPS
Role of PI3K/AKT Signaling in the Pathogenesis of Influenza	0	0.0625	0	GNAI2,NFKBIA,NFKBIB,RELA
Role of Hypercytokinemia/hyperchemokinemia in the Pathogenesis of Influenza	0	0.0233	#NUM!	IL33
MSP-RON Signaling Pathway	0	0.0345	#NUM!	ACTB,ACTG1
Extrinsic Prothrombin Activation Pathway	0	0.0625	#NUM!	F3
Cell Cycle Control of Chromosomal Replication	0	0.0179	#NUM!	CDK4
IL-17A Signaling in Airway Cells	0	0.0625	0	MAPK13,NFKBIA,NFKBIB,RELA
Role of IL-17F in Allergic Inflammatory Airway Diseases	0	0.0476	#NUM!	CREB3,RELA
Role of JAK2 in Hormone-like Cytokine Signaling	0	0.0294	#NUM!	SOCS3
Telomere Extension by Telomerase	0	0.0667	#NUM!	HNRNPA2B1
Transcriptional Regulatory Network in Embryonic Stem Cells	0	0.037	#NUM!	H3-3A/H3-3B,SET
nNOS Signaling in Skeletal Muscle Cells	0	0.0244	#NUM!	Calm1 (includes others)
Netrin Signaling	0	0.0615	2	PPP3CA,PRKAR1A,PRKAR2A,RAC1
Heparan Sulfate Biosynthesis	0	0.0385	#NUM!	AARS1,HS2ST1,PRDX6
Retinoate Biosynthesis I	0	0.0294	#NUM!	AKR1B10
Nicotine Degradation III	0	0.0526	#NUM!	Aox3,CYP2B6,CYP51A1
Heparan Sulfate Biosynthesis (Late Stages)	0	0.0423	#NUM!	AARS1,HS2ST1,PRDX6
Androgen Biosynthesis	0	0.0625	#NUM!	EBP
Ubiquinol-10 Biosynthesis (Eukaryotic)	0	0.0588	#NUM!	COQ2
tRNA Splicing	0	0.0233	#NUM!	TSEN34
The Visual Cycle	0	0.05	#NUM!	AKR1B10
Melatonin Degradation I	0	0.0333	#NUM!	CYP2B6,CYP51A1
Pyridoxal 5'-phosphate Salvage Pathway	0	0.0455	#NUM!	CDK4,DAPK1,MAP2K3
D-myo-inositol (1,4,5)-Trisphosphate Biosynthesis	0	0.04	#NUM!	CDIPT
Phospholipases	0	0.0469	#NUM!	PDIA3,PLA2G1B,PLAAT3
Chondroitin Sulfate Biosynthesis	0	0.0357	#NUM!	CHSY1,HS2ST1
Dermatan Sulfate Biosynthesis	0	0.0339	#NUM!	CHSY1,HS2ST1
tRNA Charging	0	0.0256	#NUM!	AARS1
Dermatan Sulfate Biosynthesis (Late Stages)	0	0.0217	#NUM!	HS2ST1
Nicotine Degradation II	0	0.0462	#NUM!	Aox3,CYP2B6,CYP51A1
Valine Degradation I	0	0.0526	#NUM!	ECHS1
Mitochondrial L-carnitine Shuttle Pathway	0	0.0588	#NUM!	ACSL4
Serotonin Degradation	0	0.0299	#NUM!	ADH5,AKR1A1
Triacylglycerol Biosynthesis	0	0.0476	#NUM!	ELOVL1,PLPP2
Chondroitin Sulfate Biosynthesis (Late Stages)	0	0.0417	#NUM!	CHSY1,HS2ST1
Adenosine Nucleotides Degradation II	0	0.0667	#NUM!	NT5C
Superpathway of Melatonin Degradation	0	0.0308	#NUM!	CYP2B6,CYP51A1
Noradrenaline and Adrenaline Degradation	0	0.0571	#NUM!	ADH5,AKR1A1
Acetone Degradation I (to Methylglyoxal)	0	0.0645	#NUM!	CYP2B6,CYP51A1
Putrescine Degradation III	0	0.0476	#NUM!	SAT1
Oxidative Ethanol Degradation III	0	0.0526	#NUM!	ACSS1
DNA damage-induced 14-3-3σ Signaling	0	0.0526	#NUM!	SFN
Sperm Motility	0	0.0538	2.121	Calm1 (includes others),EPHA2,FGFR2,GNAS,MAP2K3,MET,PDIA3,PLA2G1B,PLAAT3,PRKAR1A,PRKAR2A,PRKCI
Wnt/Ca+ pathway	0	0.0645	2	CREB3,PDIA3,PPP3CA,RELA
EGF Signaling	0	0.0545	#NUM!	CSNK2B,HRAS,MAPK13
GABA Receptor Signaling	0	0.0526	#NUM!	AP2M1,AP2S1,GNAS,Ubb,UBC
Phototransduction Pathway	0	0.0566	#NUM!	GNB1,PRKAR1A,PRKAR2A
cAMP-mediated signaling	0	0.0614	1.155	AKAP13,AKAP7,Calm1 (includes others),CAMK2D,CREB3,DUSP1,DUSP6,GNAI2,GNAS,PPP3CA,PRKAR1A,PRKAR2A,RAP1A,RAP1GAP
Glutamate Receptor Signaling	0	0.0526	#NUM!	Calm1 (includes others),GNB1,GNG5
Notch Signaling	0	0.0541	#NUM!	HES1,PSENEN
G-Protein Coupled Receptor Signaling	0	0.0625	#NUM!	CAMK2D,CREB3,DUSP1,DUSP6,GNAI2,GNAS,HRAS,NFKBIA,NFKBIB,PRKAR1A,PRKAR2A,RALA,RAP1A,RAP1B,RAP1GAP,RELA,RRAS
GPCR-Mediated Nutrient Sensing in Enteroendocrine Cells	0	0.0625	1.89	GNAI2,GNAS,GNG5,PDIA3,PRKAR1A,PRKAR2A,PRKCI
Gustation Pathway	0	0.0325	#NUM!	GNB1,GNG5,PRKAR1A,PRKAR2A,SCNN1A
Inflammasome pathway	0	0.05	#NUM!	CTSB
Th17 Activation Pathway	0	0.0549	0.447	HIF1A,HSP90AA1,HSP90AB1,RELA,SOCS3
SPINK1 Pancreatic Cancer Pathway	0	0.0333	#NUM!	CPM,CTSB
Apelin Muscle Signaling Pathway	0	0.0526	#NUM!	GNAS
Regulation Of The Epithelial Mesenchymal Transition In Development Pathway	0	0.0476	1	CTNNB1,HIF1A,PSENEN,RELA
Eicosanoid Signaling	0	0.0455	#NUM!	PLA2G1B,PLAAT3,PTGS1

## Sheet: tabl1 1
© 2000-2020 QIAGEN. All rights reserved.
Ingenuity Canonical Pathways		-log(p-value)		z-score	Molecules
Mitochondrial Dysfunction	44	44			ATP5F1A,ATP5F1B,ATP5F1C,ATP5F1D,ATP5MC1,ATP5MC2,ATP5MC3,ATP5MF,ATP5MG,ATP5PB,ATP5PF,ATP5PO,CAT,COX17,COX4I1,COX5A,COX6A1,COX6A2,COX6B1,COX6B2,Cox6c,COX7A2,COX7B,COX8A,CYB5A,CYC1,CYCS,GPX4,GSR,LRRK2,MT-CO1,MT-CO2,MT-CO3,MT-ND1,MT-ND2,MT-ND3,MT-ND4,MT-ND4L,MT-ND5,NDUFA11,NDUFA12,NDUFA13,NDUFA2,NDUFA3,NDUFA4,NDUFA5,NDUFA8,NDUFA9,NDUFAB1,NDUFB4,NDUFB6,NDUFB7,NDUFB8,NDUFB9,NDUFS3,NDUFS4,NDUFS6,NDUFS8,…
Protein Ubiquitination Pathway	29.8	29.8			ANAPC11,B2M,BIRC6,CDC34,CRYAB,DNAJB1,DNAJB11,DNAJB6,DNAJC5,DNAJC8,DNAJC9,ELOC,HLA-A,HLA-E,HSP90AA1,HSP90AB1,HSPA1A/HSPA1B,HSPA4,HSPA8,HSPB1,HSPB8,HSPD1,MDM2,PSMA1,PSMA2,PSMA3,PSMA4,PSMA5,PSMA6,PSMA7,PSMB1,PSMB10,PSMB2,PSMB3,PSMB4,PSMB5,PSMB6,PSMB7,PSMB8,PSMB9,PSMC1,PSMC2,PSMC3,PSMC4,PSMC5,PSMC6,PSMD1,PSMD11,PSMD12,PSMD13,PSMD14,PSMD2,PSMD3,PSMD4,PSMD6,PSMD7,PSMD8,PSME1,PSME2,SKP1,STUB1,SUGT1,TAP1…
Epithelial Adherens Junction Signaling	12.8	12.8			ACTB,ACTG1,ACTN1,ACTN4,ACTR2,ARPC1B,ARPC2,ARPC3,ARPC4,ARPC5,ARPC5L,BAIAP2,CLIP1,CTNNA1,CTNNB1,CTNND1,HRAS,LMO7,MET,MYH14,MYH9,MYL6,NECTIN1,NECTIN2,NECTIN3,RAC1,RALA,RAP1A,RAP1B,RHOA,RRAS,SSX2IP,TUBA1A,TUBA1B,TUBA1C,TUBB,TUBB2A,TUBB4B,VCL
Sertoli Cell-Sertoli Cell Junction Signaling	9.93	9.93			ACTB,ACTG1,ACTN1,ACTN4,CGN,CLDN18,CLDN3,CLDN7,CTNNA1,CTNNB1,F11R,HRAS,ILK,ITGA3,ITGB1,MAP2K3,MAPK13,NECTIN1,NECTIN2,NECTIN3,OCLN,PRKAR1A,PRKAR2A,RAC1,RALA,RAP1A,RAP1B,RRAS,SPTAN1,SPTBN1,TJP1,TJP2,TUBA1A,TUBA1B,TUBA1C,TUBB,TUBB2A,TUBB4B,VCL
Antigen Presentation Pathway	9.91	9.91			B2M,CALR,CD74,HLA-A,HLA-DMB,HLA-DQA1,HLA-DQB1,HLA-DRB5,HLA-E,PDIA3,PSMB5,PSMB6,PSMB8,PSMB9,TAP1,TAP2,TAPBP
Tight Junction Signaling	8.27	8.27			ACTB,ACTG1,CDK4,CEBPA,CGN,CLDN18,CLDN3,CLDN7,CTNNA1,CTNNB1,F11R,MYH14,MYH9,MYL6,NAPA,NECTIN1,NECTIN2,NECTIN3,NUDT21,OCLN,PPP2CA,PPP2CB,PPP2R1A,PRKAR1A,PRKAR2A,PRKCI,RAC1,RELA,RHOA,SPTAN1,TJP1,TJP2,VAPA,VCL
Clathrin-mediated Endocytosis Signaling	8.26	8.26			ACTB,ACTG1,ACTR2,AP1S1,AP2M1,AP2S1,APOE,ARPC1B,ARPC2,ARPC3,ARPC4,ARPC5,ARPC5L,CLTA,CLTB,CLU,CSNK2B,CTTN,HSPA8,ITGB1,LDLR,LYZ,MDM2,MET,PDGFA,PON1,PPP3CA,RAB11A,RAB5C,RAC1,SH3GLB1,TF,TFRC,TSG101,Ubb,UBC,VEGFA
Germ Cell-Sertoli Cell Junction Signaling	8.06	8.06			ACTB,ACTG1,ACTN1,ACTN4,Cdc42,CFL1,CFL2,CTNNA1,CTNNB1,CTNND1,GSN,HRAS,ILK,ITGA3,ITGB1,MAP2K3,NECTIN2,NECTIN3,RAC1,RALA,RAP1A,RAP1B,RHOA,RHOC,RHOD,RRAS,TJP1,TUBA1A,TUBA1B,TUBA1C,TUBB,TUBB2A,TUBB4B,VCL
Phagosome Maturation	7.75	7.75			ATP6V0E1,ATP6V1C2,ATP6V1D,ATP6V1F,B2M,CALR,CTSB,CTSC,CTSD,CTSH,Dync1i2,DYNLL1,DYNLRB1,HLA-A,HLA-DRB5,HLA-E,LAMP1,NAPA,PRDX1,PRDX2,PRDX5,PRDX6,RAB5C,TAP1,TSG101,TUBA1A,TUBA1B,TUBA1C,TUBB,TUBB2A,TUBB4B
Virus Entry via Endocytic Pathways	5.71	5.71			ACTB,ACTG1,AP1S1,AP2M1,AP2S1,B2M,CLTA,CLTB,CXADR,FLNA,HLA-A,HLA-E,HRAS,ITGA3,ITGB1,PRKCI,RAC1,RALA,RAP1A,RAP1B,RRAS,TFRC
Glucocorticoid Receptor Signaling	5.51	5.51			ACTB,ANXA1,BCL2L1,CDKN1A,CEBPA,CEBPB,DUSP1,GTF2A2,GTF2B,GTF2H5,HRAS,HSP90AA1,HSP90AB1,HSPA1A/HSPA1B,HSPA4,HSPA8,ICAM1,KRT18,KRT19,KRT23,KRT7,KRT8,MAPK13,NFKBIA,NFKBIB,POLR2C,POLR2F,POLR2G,POLR2J,POLR2L,PPP3CA,PTGES3,RAC1,RALA,RAP1A,RAP1B,RELA,RRAS,SLPI,SMARCE1,SRA1,SUMO1,TAF10,TSG101,UBE2I,YWHAH
Axonal Guidance Signaling	4.92	4.92			ACTR2,ADAM19,ADAM9,ARPC1B,ARPC2,ARPC3,ARPC4,ARPC5,ARPC5L,BAIAP2,BMP4,CFL1,CFL2,COPS5,DPYSL2,EFNA1,EIF4E,EPHA2,GNAI2,GNAS,GNB1,GNB2,GNG5,HRAS,ITGA3,ITGB1,MET,MME,MYL12A,MYL12B,MYL6,NRP1,PDGFA,PDIA3,PFN1,PLXNB2,PPP3CA,PRKAR1A,PRKAR2A,PRKCI,PSMD14,RAC1,RALA,RAP1A,RAP1B,RHOA,RHOD,ROCK1,RRAS,RTN4,SDCBP,TUBA1A,TUBA1B,TUBA1C,TUBB,TUBB2A,TUBB4B,VEGFA
GADD45 Signaling	4.82	4.82			CCND1,CCND2,CCND3,CDK4,CDKN1A,GADD45A,GADD45B,GADD45G
Mechanisms of Viral Exit from Host Cells	4.25	4.25			ACTB,ACTG1,CHMP2A,CHMP2B,CHMP3,CHMP4B,PDCD6IP,PRKCI,SH3GLB1,TSG101,VPS36
Prostate Cancer Signaling	4	4			CCND1,CDKN1A,CREB3,CTNNB1,GSTP1,HRAS,HSP90AA1,HSP90AB1,MDM2,NFKBIA,NFKBIB,PA2G4,RALA,RAP1A,RAP1B,RELA,RRAS
Hereditary Breast Cancer Signaling	3.81	3.81			ACTB,CCND1,CDK4,CDKN1A,GADD45A,GADD45B,GADD45G,HRAS,NPM1,POLR2C,POLR2F,POLR2G,POLR2J,POLR2L,RALA,RAP1A,RAP1B,RRAS,SFN,SMARCE1,Ubb,UBC
Role of Tissue Factor in Cancer	3.56	3.56			BCL2L1,CCN1,CFL1,CFL2,EGR1,EIF4E,F3,HBEGF,HRAS,ITGA3,ITGAV,ITGB1,MAPK13,RAC1,RALA,RAP1A,RAP1B,RRAS,VEGFA
Caveolar-mediated Endocytosis Signaling	3.52	3.52			ACTB,ACTG1,B2M,CAVIN1,COPE,FLNA,FLOT1,HLA-A,HLA-E,ITGA3,ITGA9,ITGAV,ITGB1,RAB5C
Iron homeostasis signaling pathway	3.51	3.51			ATP6V0E1,ATP6V1C2,ATP6V1D,ATP6V1F,BMP4,CIAO2B,EPAS1,FTH1,FTL,GDF15,HIF1A,HMOX2,HP,ISCU,NUBP1,PCBP1,PDGFA,SKP1,SLC48A1,TF,TFRC
Semaphorin Signaling in Neurons	3.27	3.27			Cdc42,CFL1,CFL2,DPYSL2,ITGB1,MET,NRP1,RAC1,RHOA,RHOC,RHOD,ROCK1
FAT10 Signaling Pathway	3.09	3.09			MAP1LC3B,NUB1,PSMD4,PSME1,PSME2,SQSTM1
Xenobiotic Metabolism Signaling	3.06	3.06			CAMK2D,CAT,CES1,CITED2,CYP2B6,ESD,FTL,GCLC,GSTA3,GSTM5,GSTP1,HRAS,HS2ST1,HSP90AA1,HSP90AB1,MAP2K3,MAPK13,MGST1,MGST3,NFE2L2,PPP2CA,PPP2CB,PPP2R1A,PRKCI,PTGES3,RALA,RAP1A,RAP1B,RELA,RRAS,SCAND1,SNW1,SRA1,SUMO1
Pentose Phosphate Pathway (Oxidative Branch)	2.94	2.94			H6PD,PGD,PGLS
IL-10 Signaling	2.71	2.71			BLVRB,CD14,IL10RB,IL33,IL4R,LBP,MAP2K3,MAPK13,NFKBIA,NFKBIB,RELA,SOCS3
Molecular Mechanisms of Cancer	2.53	2.53			BAX,BCL2L1,BMP4,CAMK2D,CCND1,CCND2,CCND3,Cdc42,CDK4,CDKN1A,CTNNA1,CTNNB1,CTNND1,CYCS,DIABLO,GNAI2,GNAS,HIF1A,HRAS,ITGA3,ITGB1,MAP2K3,MAPK13,MDM2,NFKBIA,NFKBIB,PA2G4,PRKAR1A,PRKAR2A,PRKCI,PSENEN,RAC1,RALA,RALBP1,RAP1A,RAP1B,RELA,RHOA,RHOC,RHOD,RRAS
Gap Junction Signaling	2.46	2.46			ACTB,ACTG1,CTNNB1,GNAI2,GNAS,HRAS,NT5C,PDIA3,PPP3CA,PRKAR1A,PRKAR2A,PRKCI,RALA,RAP1A,RAP1B,RRAS,TJP1,TJP2,TUBA1A,TUBA1B,TUBA1C,TUBB,TUBB2A,TUBB4B
FAK Signaling	2.37	2.37			ACTB,ACTG1,CAPN2,CAPNS1,HRAS,ITGA3,ITGB1,RAC1,RALA,RAP1A,RAP1B,RRAS,TLN1,VCL
Formaldehyde Oxidation II (Glutathione-dependent)	2.35	2.35			ADH5,ESD
Dopamine Receptor Signaling	2.31	2.31			PPP1CA,PPP1CB,Ppp1cc,PPP1R11,PPP1R12A,PPP1R14B,PPP1R14C,PPP2CA,PPP2CB,PPP2R1A,PRKAR1A,PRKAR2A
Zymosterol Biosynthesis	2.29	2.29			CYP51A1,MSMO1,NSDHL
Assembly of RNA Polymerase II Complex	2.26	2.26			GTF2A2,GTF2B,GTF2H5,POLR2C,POLR2F,POLR2G,POLR2J,POLR2L,TAF10
Systemic Lupus Erythematosus Signaling	2.23	2.23			C5,C6,HLA-A,HLA-E,HNRNPA2B1,HNRNPC,HRAS,IL33,LSM2,LSM4,LSM6,PRPF40A,RALA,RAP1A,RAP1B,RRAS,SF3B4,SNRNP27,SNRPA1,SNRPB,SNRPD1,SNRPD2,SNRPD3,SNU13,TXNL4A,ZCRB1
Regulation of IL-2 Expression in Activated and Anergic T Lymphocytes	2.21	2.21			BCL10,Calm1 (includes others),HRAS,NFKBIA,NFKBIB,PPP3CA,RAC1,RALA,RAP1A,RAP1B,RELA,RRAS,TOB1
Lipid Antigen Presentation by CD1	2.19	2.19			AP2M1,AP2S1,B2M,CALR,PDIA3,PSAP
Aldosterone Signaling in Epithelial Cells	2.02	2.02			CRYAB,DNAJB1,DNAJB11,DNAJB6,DNAJC5,DNAJC8,DNAJC9,DUSP1,HSP90AA1,HSP90AB1,HSPA1A/HSPA1B,HSPA4,HSPA8,HSPB1,HSPB8,HSPD1,PDIA3,PRKCI,SCNN1A
RAR Activation	1.97	1.97			ACTB,AKR1B10,CITED2,CSNK2B,DUSP1,GTF2H5,MAPK13,PNRC1,PRKAR1A,PRKAR2A,PRKCI,PRMT1,PRMT2,PSMC5,RAC1,RELA,RPL7A,SCAND1,SMARCE1,SNW1,SRA1,VEGFA
D-glucuronate Degradation I	1.89	1.89			AKR1A1,DCXR
Glutathione Biosynthesis	1.89	1.89			GCLC,GCLM
Polyamine Regulation in Colon Cancer	1.87	1.87			AZIN1,CTNNB1,PSME1,PSME2,SAT1
Adipogenesis pathway	1.76	1.76			BMP4,BSCL2,CEBPA,CEBPB,CTNNB1,FGFR2,GTF2H5,HIF1A,KLF5,LPL,RBBP4,RBBP7,SAP18,SIN3B,SREBF1,TXNIP
Role of Macrophages, Fibroblasts and Endothelial Cells in Rheumatoid Arthritis	1.74	1.74			C5,Calm1 (includes others),CAMK2D,CCND1,CEBPA,CEBPB,CREB3,CTNNB1,HRAS,ICAM1,IL18R1,IL33,MAP2K3,MIF,NFKBIA,NFKBIB,PDGFA,PDIA3,PPP3CA,PRKCI,RAC1,RALA,RAP1A,RAP1B,RELA,RHOA,ROCK1,RRAS,SOCS3,TRAF4,VEGFA
Phosphatidylethanolamine Biosynthesis II	1.73	1.73			CHKA,ETNK1,PCYT2
Sucrose Degradation V (Mammalian)	1.73	1.73			ALDOA,KHK,TPI1
Autophagy	1.71	1.71			ATG3,CTSB,CTSC,CTSD,CTSH,LAMP1,MAP1LC3A,MAP1LC3B,SQSTM1
Chronic Myeloid Leukemia Signaling	1.7	1.7			BCL2L1,CBLC,CCND1,CDK4,CDKN1A,HRAS,MDM2,PA2G4,RALA,RAP1A,RAP1B,RELA,RRAS
HER-2 Signaling in Breast Cancer	1.62	1.62			AREG,CCND1,CDKN1A,HRAS,ITGB1,MDM2,PRKCI,RALA,RAP1A,RAP1B,RRAS
TR/RXR Activation	1.62	1.62			ACACA,ENO1,FASN,HIF1A,HP,LDLR,MDM2,ME1,SREBF1,SREBF2,UCP2
Glutathione Redox Reactions II	1.61	1.61			GSR,PDIA3
Heme Degradation	1.61	1.61			BLVRB,HMOX2
Hepatic Fibrosis / Hepatic Stellate Cell Activation	1.61	1.61			BAMBI,BAX,CD14,COL4A1,COL4A2,COL4A4,FGFR2,ICAM1,IFNGR2,IL4R,KLF6,LBP,MET,MYH14,MYH9,MYL6,PDGFA,RELA,TIMP2,VEGFA
IL-4 Signaling	1.58	1.58			HLA-A,HLA-DMB,HLA-DQA1,HLA-DQB1,HLA-DRB5,HRAS,IL4R,RALA,RAP1A,RAP1B,RRAS
Nucleotide Excision Repair Pathway	1.57	1.57			GTF2H5,POLR2C,POLR2F,POLR2G,POLR2J,POLR2L
Cellular Effects of Sildenafil (Viagra)	1.54	1.54			ACTB,ACTG1,Calm1 (includes others),GNAS,MPRIP,MYH14,MYH9,MYL12A,MYL12B,MYL6,PDIA3,PPP1CB,PPP1R12A,PRKAR1A,PRKAR2A
Erythropoietin Signaling	1.53	1.53			HRAS,NFKBIA,NFKBIB,PRKCI,RALA,RAP1A,RAP1B,RELA,RRAS,SOCS3
Ingenuity Canonical Pathways		-log(p-value)		z-score	Molecules
Oxidative Phosphorylation	46	46	5.5	5.5	ATP5F1A,ATP5F1B,ATP5F1C,ATP5F1D,ATP5MC1,ATP5MC2,ATP5MC3,ATP5MF,ATP5MG,ATP5PB,ATP5PF,ATP5PO,COX17,COX4I1,COX5A,COX6A1,COX6A2,COX6B1,COX6B2,Cox6c,COX7A2,COX7B,COX8A,CYB5A,CYC1,CYCS,MT-CO1,MT-CO2,MT-CO3,MT-ND1,MT-ND2,MT-ND3,MT-ND4,MT-ND4L,MT-ND5,NDUFA11,NDUFA12,NDUFA13,NDUFA2,NDUFA3,NDUFA4,NDUFA5,NDUFA8,NDUFA9,NDUFAB1,NDUFB4,NDUFB6,NDUFB7,NDUFB8,NDUFB9,NDUFS3,NDUFS4,NDUFS6,NDUFS8,NDUFV2,SDHB,SDHD,UQ…
EIF2 Signaling	34	34	5.754	5.754	ACTB,ATF3,CCND1,EIF1AX,EIF1AY,EIF2S1,EIF2S2,EIF3B,EIF3C,EIF3D,EIF3E,EIF3F,EIF3G,EIF3H,EIF3I,EIF3K,EIF3L,EIF3M,EIF4A1,EIF4A3,EIF4E,EIF4G2,EIF5,EIF5B,HRAS,PABPC1,PPP1CA,PPP1CB,Ppp1cc,PPP1R15A,RALA,RAP1A,RAP1B,RPL10A,RPL11,RPL12,RPL13,RPL13A,RPL15,RPL17,RPL18,RPL18A,RPL19,RPL23,RPL24,RPL27,RPL27A,RPL28,RPL3,RPL39,RPL4,RPL6,RPL7,RPL7A,RPL9,RPLP0,RPS10,RPS11,RPS13,RPS16,RPS17,RPS18,RPS19,RPS2,RPS20,RP…
NRF2-mediated Oxidative Stress Response	16.1	16.1	4.802	4.802	ACTB,ACTG1,AKR1A1,CAT,CCT7,CDC34,DNAJA2,DNAJB1,DNAJB11,DNAJB6,DNAJC5,DNAJC8,DNAJC9,EPHX1,ERP29,FTH1,FTL,GCLC,GCLM,GPX2,GSR,GSTA3,GSTM5,GSTP1,HACD3,HERPUD1,HRAS,HSPB8,JUNB,JUND,MAFF,MAFG,MAP2K3,MGST1,MGST3,NFE2L2,PRDX1,PRKCI,RALA,RAP1A,RAP1B,RRAS,SQSTM1,STIP1,TXN,TXNRD1,UBE2K,USP14,VCP
mTOR Signaling	16.1	16.1	2.828	2.828	Cdc42,DDIT4,EIF3B,EIF3C,EIF3D,EIF3E,EIF3F,EIF3G,EIF3H,EIF3I,EIF3K,EIF3L,EIF3M,EIF4A1,EIF4A3,EIF4E,EIF4G2,FKBP1A,HIF1A,HRAS,PPP2CA,PPP2CB,PPP2R1A,PRKCI,RAC1,RALA,RAP1A,RAP1B,RHEB,RHOA,RHOC,RHOD,RPS10,RPS11,RPS13,RPS16,RPS17,RPS18,RPS19,RPS2,RPS20,RPS26,RPS27L,RPS28,RPS3,RPS4Y1,RPS5,RPS6,RPS7,RPSA,RRAS,VEGFA
Remodeling of Epithelial Adherens Junctions	14.1	14.1	2.714	2.714	ACTB,ACTG1,ACTN1,ACTN4,ACTR2,ARPC1B,ARPC2,ARPC3,ARPC4,ARPC5,ARPC5L,CLIP1,CTNNA1,CTNNB1,CTNND1,MAPRE1,MET,NME1,RAB5C,RALA,TUBA1A,TUBA1B,TUBA1C,TUBB,TUBB2A,TUBB4B,VCL
Actin Cytoskeleton Signaling	10.5	10.5	4.427	4.427	ACTB,ACTG1,ACTN1,ACTN4,ACTR2,ARPC1B,ARPC2,ARPC3,ARPC4,ARPC5,ARPC5L,BAIAP2,BRK1,CD14,CFL1,CFL2,EZR,FLNA,GSN,HRAS,ITGA3,ITGB1,LBP,MPRIP,MSN,MYH14,MYH9,MYL12A,MYL12B,MYL6,PDGFA,PFN1,PPP1CB,PPP1R12A,RAC1,RALA,RAP1A,RAP1B,RHOA,ROCK1,RRAS,TLN1,VCL,WASF2
Hypoxia Signaling in the Cardiovascular System	10.4	10.4	2.828	2.828	BIRC6,CDC34,COPS5,CREB3,HIF1A,HSP90AA1,HSP90AB1,LDHA,MDM2,NFKBIA,NFKBIB,SUMO1,UBE2A,UBE2B,UBE2D2,UBE2D3,UBE2I,UBE2J2,UBE2K,UBE2L3,UBE2M,UBE2N,UBE2S,VEGFA
Regulation of Actin-based Motility by Rho	10.3	10.3	3.674	3.674	ACTB,ACTR2,ARHGDIA,ARPC1B,ARPC2,ARPC3,ARPC4,ARPC5,ARPC5L,BAIAP2,Cdc42,CFL1,GSN,ITGA3,ITGB1,MPRIP,MYL12A,MYL12B,MYL6,PFN1,PPP1CB,PPP1R12A,RAC1,RHOA,RHOC,RHOD,ROCK1
Integrin Signaling	9.13	9.13	5	5	ACTB,ACTG1,ACTN1,ACTN4,ACTR2,ARF1,ARF4,ARPC1B,ARPC2,ARPC3,ARPC4,ARPC5,ARPC5L,CAPN2,CAPNS1,Cdc42,CTTN,GSN,HRAS,ILK,ITGA3,ITGA9,ITGAV,ITGB1,MPRIP,MYL12A,MYL12B,PFN1,PPP1CB,PPP1R12A,RAC1,RALA,RAP1A,RAP1B,RHOA,RHOC,RHOD,ROCK1,RRAS,TLN1,VCL
Actin Nucleation by ARP-WASP Complex	9.06	9.06	4.146	4.146	ACTR2,ARPC1B,ARPC2,ARPC3,ARPC4,ARPC5,ARPC5L,BAIAP2,Cdc42,HRAS,ITGA3,ITGB1,PPP1R12A,RAC1,RALA,RAP1A,RAP1B,RHOA,RHOC,RHOD,ROCK1,RRAS
PI3K/AKT Signaling	8.35	8.35	3.286	3.286	BCL2L1,CCND1,CDC37,CDKN1A,CTNNB1,EIF4E,GDF15,HRAS,HSP90AA1,HSP90AB1,IL10RB,IL18R1,IL4R,ILK,ITGA3,ITGB1,MCL1,MDM2,NFKBIA,NFKBIB,PPP2CA,PPP2CB,PPP2R1A,RALA,RAP1A,RAP1B,RELA,RHEB,RRAS,SFN,YWHAB,YWHAE,YWHAH,YWHAQ,YWHAZ
Cdc42 Signaling	7.23	7.23	2.711	2.711	ACTR2,ARPC1B,ARPC2,ARPC3,ARPC4,ARPC5,ARPC5L,B2M,BAIAP2,CDC42BPA,CDC42SE1,CFL1,CFL2,CLIP1,EXOC4,HLA-A,HLA-DMB,HLA-DQA1,HLA-DQB1,HLA-DRB5,HLA-E,ITGA3,ITGB1,MAPK13,MPRIP,MYL12A,MYL12B,MYL6,PPP1CB,PPP1R12A,PRKCI,RALA
fMLP Signaling in Neutrophils	6.22	6.22	3.962	3.962	ACTR2,ARPC1B,ARPC2,ARPC3,ARPC4,ARPC5,ARPC5L,Calm1 (includes others),GNAI2,GNAS,GNB1,GNB2,GNG5,HRAS,NFKBIA,NFKBIB,PPP3CA,PRKCI,RAC1,RALA,RAP1A,RAP1B,RELA,RRAS
Estrogen Receptor Signaling	6.18	6.18	5.217	5.217	ATP5F1A,ATP5F1C,ATP5F1D,ATP5MC1,ATP5PB,CCND1,CDKN1A,CFL1,CFL2,CREB3,CYC1,DDX5,EIF4E,GNAI2,GNAS,GNB1,GNG5,HES1,HIF1A,HRAS,HSP90AA1,HSP90AB1,MED10,MED21,MED30,MPRIP,MYL12A,MYL12B,MYL6,PDIA3,PPP1CB,PPP1R12A,PRKAR1A,PRKAR2A,PRKCI,RALA,RAP1A,RAP1B,RELA,RHOA,ROCK1,RRAS,SDHD,SRA1,UQCRC2,UQCRFS1,VEGFA
Ephrin Receptor Signaling	5.96	5.96	4.811	4.811	ACP1,ACTR2,ARPC1B,ARPC2,ARPC3,ARPC4,ARPC5,ARPC5L,CFL1,CFL2,CREB3,EFNA1,EPHA2,GNAI2,GNAS,GNB1,GNB2,GNG5,HRAS,ITGA3,ITGB1,PDGFA,RAC1,RALA,RAP1A,RAP1B,RHOA,ROCK1,RRAS,SDCBP,VEGFA
Rac Signaling	5.92	5.92	4.69	4.69	ACTR2,ARPC1B,ARPC2,ARPC3,ARPC4,ARPC5,ARPC5L,BAIAP2,BRK1,CD44,CFL1,CFL2,HRAS,ITGA3,ITGB1,PRKCI,RAC1,RALA,RAP1A,RAP1B,RELA,RHOA,RRAS
Leukocyte Extravasation Signaling	5.56	5.56	4.041	4.041	ACTB,ACTG1,ACTN1,ACTN4,CD44,CLDN18,CLDN3,CLDN7,CTNNA1,CTNNB1,CTNND1,CTTN,CYBA,EZR,F11R,GNAI2,ICAM1,ITGA3,ITGB1,MAPK13,MSN,MYL6,PRKCI,RAC1,RAP1A,RAP1B,RAP1GAP,RHOA,ROCK1,TIMP2,TIMP3,VCL
ILK Signaling	5.45	5.45	2.646	2.646	ACTB,ACTG1,ACTN1,ACTN4,CCND1,Cdc42,CFL1,CFL2,CREB3,CTNNB1,FLNA,HIF1A,ILK,ITGB1,KRT18,MYH14,MYH9,MYL6,PPP1R12A,PPP1R14B,PPP2CA,PPP2CB,PPP2R1A,RAC1,RELA,RHOA,RHOC,RHOD,RSU1,VCL,VEGFA
Regulation of Cellular Mechanics by Calpain Protease	5.37	5.37	2.53	2.53	ACTN1,ACTN4,CAPN2,CAPNS1,CCND1,CDK4,EZR,HRAS,ITGA3,ITGB1,RALA,RAP1A,RAP1B,RRAS,TLN1,VCL
RhoA Signaling	5.2	5.2	3.545	3.545	ACTB,ACTG1,ACTR2,ARPC1B,ARPC2,ARPC3,ARPC4,ARPC5,ARPC5L,BAIAP2,CFL1,CFL2,EZR,MPRIP,MSN,MYL12A,MYL12B,MYL6,PFN1,PPP1CB,PPP1R12A,RHOA,ROCK1
VEGF Signaling	5.12	5.12	3.357	3.357	ACTB,ACTG1,ACTN1,ACTN4,BCL2L1,EIF1AX,EIF1AY,EIF2S1,EIF2S2,HIF1A,HRAS,RALA,RAP1A,RAP1B,ROCK1,RRAS,SFN,VCL,VEGFA,YWHAE
IL-8 Signaling	4.98	4.98	4.914	4.914	BAX,BCL2L1,CCND1,CCND2,CCND3,Cdc42,CSTB,GNAI2,GNAS,GNB1,GNB2,GNG5,HBEGF,HRAS,ICAM1,ITGAV,LASP1,MYL12B,NFKBIB,PRKCI,RAC1,RALA,RAP1A,RAP1B,RELA,RHOA,RHOC,RHOD,ROCK1,RRAS,VEGFA
CCR3 Signaling in Eosinophils	4.63	4.63	2.53	2.53	Calm1 (includes others),CFL1,CFL2,GNAI2,GNAS,GNB1,GNB2,GNG5,HRAS,MAPK13,MPRIP,PLA2G1B,PPP1CB,PPP1R12A,PRKCI,RAC1,RALA,RAP1A,RAP1B,RHOA,ROCK1,RRAS
Signaling by Rho Family GTPases	4.4	4.4	4.6	4.6	ACTB,ACTG1,ACTR2,ARPC1B,ARPC2,ARPC3,ARPC4,ARPC5,ARPC5L,BAIAP2,Cdc42,CFL1,CFL2,CLIP1,EZR,GNAI2,GNAS,GNB1,GNB2,GNG5,ITGA3,ITGB1,MSN,MYL12A,MYL12B,MYL6,PPP1R12A,PRKCI,RAC1,RELA,RHOA,RHOC,RHOD,ROCK1
Xenobiotic Metabolism PXR Signaling Pathway	4.08	4.08	2.268	2.268	CAMK2D,CAT,CES1,CITED2,CYP2B6,ESD,GSTA3,GSTM5,GSTP1,HS2ST1,HSP90AA1,HSP90AB1,MGST1,MGST3,PPM1A,PPP1CA,PPP1CB,Ppp1cc,PPP1R11,PPP1R12A,PPP1R14B,PPP1R14C,PRKAR1A,PRKAR2A,PRKCI,SCAND1,SNW1,SRA1
14-3-3-mediated Signaling	3.98	3.98	3.606	3.606	BAX,HRAS,PDCD6IP,PDIA3,PRKCI,RALA,RAP1A,RAP1B,RRAS,SFN,TUBA1A,TUBA1B,TUBA1C,TUBB,TUBB2A,TUBB4B,YWHAB,YWHAE,YWHAH,YWHAQ,YWHAZ
p70S6K Signaling	3.88	3.88	2.324	2.324	BCAP31,EEF2,GNAI2,HRAS,IL4R,PDIA3,PPP2CA,PPP2CB,PPP2R1A,PRKCI,RALA,RAP1A,RAP1B,RPS6,RRAS,SFN,YWHAB,YWHAE,YWHAH,YWHAQ,YWHAZ
IGF-1 Signaling	3.76	3.76	2.53	2.53	CCN1,CSNK2B,HRAS,IGFBP7,PRKAR1A,PRKAR2A,PRKCI,RALA,RAP1A,RAP1B,RRAS,SFN,SOCS3,YWHAB,YWHAE,YWHAH,YWHAQ,YWHAZ
Gluconeogenesis I	3.68	3.68	2.121	2.121	ALDOA,ENO1,GAPDH,GPI,MDH1,MDH2,ME1,PGAM1
Endocannabinoid Developing Neuron Pathway	3.66	3.66	3.638	3.638	CCND1,CREB3,CTNNB1,GNAI2,GNB1,GNG5,HRAS,MAP2K3,MAPK13,MGLL,PRKAR1A,PRKAR2A,RAC1,RALA,RAP1A,RAP1B,RAP1GAP,RHOA,RRAS
Paxillin Signaling	3.55	3.55	4	4	ACTB,ACTG1,ACTN1,ACTN4,ARF1,HRAS,ITGA3,ITGA9,ITGAV,ITGB1,MAPK13,RAC1,RALA,RAP1A,RAP1B,RRAS,TLN1,VCL
Glioma Invasiveness Signaling	3.46	3.46	2.309	2.309	CD44,Cdc42,HRAS,ITGAV,RAC1,RALA,RAP1A,RAP1B,RHOA,RHOC,RHOD,RRAS,TIMP2,TIMP3
Reelin Signaling in Neurons	3.44	3.44	3.771	3.771	ACTR2,APBB1,APOE,ARPC1B,ARPC2,ARPC3,ARPC4,ARPC5,ARPC5L,CAMK2D,CFL1,ITGA3,ITGB1,MAP2K3,NECTIN3,PAFAH1B1,RAC1,RAP1A,RAP1B,RHOA
CD28 Signaling in T Helper Cells	3.41	3.41	3.464	3.464	ACTR2,ARPC1B,ARPC2,ARPC3,ARPC4,ARPC5,ARPC5L,BCL10,Calm1 (includes others),HLA-A,HLA-DMB,HLA-DQA1,HLA-DQB1,HLA-DRB5,NFKBIA,NFKBIB,PPP3CA,RAC1,RELA
Interferon Signaling	3.32	3.32	2.333	2.333	BAX,IFI35,IFITM3,IFNGR2,IRF1,ISG15,PSMB8,RELA,TAP1
Synaptogenesis Signaling Pathway	3.28	3.28	4.226	4.226	ACTR2,AP2M1,AP2S1,APOE,ARPC1B,ARPC2,ARPC3,ARPC4,ARPC5,ARPC5L,Calm1 (includes others),CAMK2D,CFL1,CREB3,CTNNB1,CTNND1,DNAJC5,EFNA1,EPHA2,HRAS,HSPA8,NAP1L1,NAPA,NECTIN1,NECTIN3,PAFAH1B1,PRKAR1A,PRKAR2A,RAB5C,RAC1,RALA,RAP1A,RAP1B,RHOA,RRAS,THBS1,TLN1
IL-6 Signaling	3.19	3.19	2.668	2.668	CD14,CEBPB,CSNK2B,HRAS,HSPB1,IL33,LBP,MAP2K3,MAPK13,MCL1,NFKBIA,NFKBIB,RALA,RAP1A,RAP1B,RELA,RRAS,SOCS3,VEGFA
Thrombin Signaling	3.13	3.13	4	4	CAMK2D,Cdc42,GNAI2,GNAS,GNB1,GNB2,GNG5,HRAS,MAPK13,MPRIP,MYL12A,MYL12B,MYL6,PDIA3,PPP1CB,PPP1R12A,PRKCI,RAC1,RALA,RAP1A,RAP1B,RELA,RHOA,RHOC,RHOD,ROCK1,RRAS
Glutathione Redox Reactions I	3.13	3.13	2.646	2.646	GPX2,GPX4,GSR,GSTP1,MGST1,MGST3,PRDX6
ERK5 Signaling	3.05	3.05	3.606	3.606	CREB3,HRAS,RALA,RAP1A,RAP1B,RRAS,SFN,WNK1,YWHAB,YWHAE,YWHAH,YWHAQ,YWHAZ
Hepatic Fibrosis Signaling Pathway	3.02	3.02	3.592	3.592	BAMBI,Calm1 (includes others),CCND1,Cdc42,CEBPB,CREB3,CTNNB1,FTH1,FTL,GNAI2,HIF1A,HRAS,ICAM1,IL33,ITGA3,ITGB1,MAP2K3,MAPK13,MYL12A,MYL12B,MYL6,NFKBIA,NFKBIB,PDGFA,PRKAR1A,PRKAR2A,PRKCI,RAC1,RALA,RAP1A,RAP1B,RELA,RHOA,RHOC,RHOD,ROCK1,RRAS,SDHB,TF,TFRC,VEGFA
LPS-stimulated MAPK Signaling	2.99	2.99	3.606	3.606	CD14,HRAS,LBP,MAP2K3,MAPK13,NFKBIA,NFKBIB,PRKCI,RAC1,RALA,RAP1A,RAP1B,RELA,RRAS
Insulin Receptor Signaling	2.98	2.98	2.236	2.236	ACLY,EIF4E,HRAS,PPP1CA,PPP1CB,Ppp1cc,PPP1R11,PPP1R12A,PPP1R14B,PPP1R14C,PRKAR1A,PRKAR2A,PRKCI,PTPRF,RALA,RAP1A,RAP1B,RRAS,SCNN1A,SOCS3
Glycolysis I	2.9	2.9	2.646	2.646	ALDOA,ENO1,GAPDH,GPI,PGAM1,PKM,TPI1
Cardiac Hypertrophy Signaling	2.82	2.82	4.707	4.707	ADSS2,Calm1 (includes others),Cdc42,EIF4E,GNAI2,GNAS,GNB1,GNB2,GNG5,HRAS,HSPB1,MAP2K3,MAPK13,MYL12A,MYL12B,MYL6,PDIA3,PPP3CA,PRKAR1A,PRKAR2A,RAC1,RALA,RAP1A,RAP1B,RHOA,RHOC,RHOD,ROCK1,RRAS
Macropinocytosis Signaling	2.82	2.82	2.121	2.121	ACTN4,CD14,HRAS,ITGB1,MET,PDGFA,PRKCI,RAC1,RALA,RAP1A,RAP1B,RHOA,RRAS
Necroptosis Signaling Pathway	2.73	2.73	3.273	3.273	CAMK2D,CAPN2,CAPNS1,DAPK1,FKBP1A,MDM2,PLA2G1B,PPP3CA,SLC25A3,SLC25A4,TIMM13,TIMM17A,TIMM8B,TOMM20,TOMM22,TOMM7,TSPO,UBC,VDAC1,VDAC2,VDAC3
PI3K Signaling in B Lymphocytes	2.67	2.67	3.771	3.771	ATF3,BCL10,C3,Calm1 (includes others),CAMK2D,CD81,HRAS,IL4R,NFKBIA,NFKBIB,PDIA3,PPP3CA,PRKCI,RAC1,RALA,RAP1A,RAP1B,RELA,RRAS
Phospholipase C Signaling	2.67	2.67	3.53	3.53	AHNAK,Calm1 (includes others),Cdc42,CREB3,GNAS,GNB1,GNB2,GNG5,HRAS,ITGA3,ITGB1,MPRIP,MYL12A,MYL12B,MYL6,PEBP1,PLA2G1B,PPP1CB,PPP1R12A,PPP3CA,PRKCI,RAC1,RALA,RAP1A,RAP1B,RELA,RHOA,RHOC,RHOD,RRAS
iNOS Signaling	2.59	2.59	2.449	2.449	Calm1 (includes others),CD14,IFNGR2,IRF1,LBP,MAPK13,NFKBIA,NFKBIB,RELA
Type I Diabetes Mellitus Signaling	2.53	2.53	2.333	2.333	CYCS,HLA-A,HLA-DMB,HLA-DQA1,HLA-DQB1,HLA-DRB5,HLA-E,HSPD1,IFNGR2,IRF1,MAP2K3,MAPK13,NFKBIA,NFKBIB,RELA,SOCS3
Senescence Pathway	2.5	2.5	2.556	2.556	ANAPC11,ATF3,Calm1 (includes others),CAPN2,CAPNS1,CAT,CCND1,CDK4,CDKN1A,CEBPB,DHCR24,EED,EIF4E,GADD45A,GADD45B,GADD45G,HRAS,MAP2K3,MDM2,PPP1CA,PPP2CA,PPP2CB,PPP2R1A,PPP3CA,RALA,RAP1A,RAP1B,RRAS,SQSTM1,YPEL3,ZFP36L1
Fcγ Receptor-mediated Phagocytosis in Macrophages and Monocytes	2.42	2.42	3.742	3.742	ACTB,ACTG1,ACTR2,ARPC1B,ARPC2,ARPC3,ARPC4,ARPC5,ARPC5L,EZR,PRKCI,RAB11A,RAC1,TLN1
CXCR4 Signaling	2.4	2.4	3.9	3.9	Cdc42,EGR1,GNAI2,GNAS,GNB1,GNB2,GNG5,HRAS,MYL12A,MYL12B,MYL6,PRKCI,RAC1,RALA,RAP1A,RAP1B,RHOA,RHOC,RHOD,ROCK1,RRAS
Spliceosomal Cycle	2.39	2.39	3	3	CWC15,DDX39B,EIF4A3,HSPA8,RBM8A,SF3B1,SF3B2,SF3B4,SF3B6
Calcium-induced T Lymphocyte Apoptosis	2.38	2.38	2.53	2.53	Calm1 (includes others),CAPN2,HLA-A,HLA-DMB,HLA-DQA1,HLA-DQB1,HLA-DRB5,NR4A1,ORAI1,PPP3CA,PRKCI
Neuregulin Signaling	2.33	2.33	3.162	3.162	AREG,ERRFI1,HBEGF,HRAS,HSP90AA1,HSP90AB1,ITGA3,ITGB1,PRKCI,RALA,RAP1A,RAP1B,RPS6,RRAS
α-Adrenergic Signaling	2.33	2.33	3	3	Calm1 (includes others),GNAI2,GNAS,GNB1,GNB2,GNG5,HRAS,PRKAR1A,PRKAR2A,PRKCI,RALA,RAP1A,RAP1B,RRAS
PAK Signaling	2.29	2.29	3.464	3.464	CFL1,CFL2,HRAS,ITGA3,ITGB1,MYL12A,MYL12B,MYL6,PDGFA,RAC1,RALA,RAP1A,RAP1B,RRAS
Bladder Cancer Signaling	2.29	2.29	2.449	2.449	CCND1,CDK4,CDKN1A,DAPK1,HRAS,MDM2,PA2G4,RALA,RAP1A,RAP1B,RASSF1,RRAS,THBS1,VEGFA
Agrin Interactions at Neuromuscular Junction	2.26	2.26	3.464	3.464	ACTB,ACTG1,AGRN,CTTN,HRAS,ITGA3,ITGB1,RAC1,RALA,RAP1A,RAP1B,RRAS
Melanoma Signaling	2.26	2.26	2.333	2.333	CCND1,CDK4,CDKN1A,HRAS,MDM2,RALA,RAP1A,RAP1B,RRAS
GNRH Signaling	2.23	2.23	3.578	3.578	Calm1 (includes others),CAMK2D,CREB3,EGR1,GNAI2,GNAS,GNB1,GNG5,HBEGF,HRAS,MAP2K3,MAPK13,PRKAR1A,PRKAR2A,PRKCI,RAC1,RALA,RAP1A,RAP1B,RELA,RRAS
Glioma Signaling	2.18	2.18	3	3	Calm1 (includes others),CAMK2D,CCND1,CDK4,CDKN1A,HRAS,IDH2,MDM2,PA2G4,PDGFA,PRKCI,RALA,RAP1A,RAP1B,RRAS
GM-CSF Signaling	2.18	2.18	2.53	2.53	BCL2L1,CAMK2D,CCND1,CISH,HRAS,PPP3CA,RACK1,RALA,RAP1A,RAP1B,RRAS
Inhibition of ARE-Mediated mRNA Degradation Pathway	2.13	2.13	2	2	EXOSC7,MAPK13,PPP2CA,PPP2CB,PPP2R1A,PRKAR1A,PRKAR2A,PSME1,PSME2,SFN,YWHAB,YWHAE,YWHAH,YWHAQ,YWHAZ,ZFP36L1
NF-κB Activation by Viruses	2.09	2.09	3.464	3.464	HRAS,ITGA3,ITGAV,ITGB1,NFKBIA,NFKBIB,PRKCI,RALA,RAP1A,RAP1B,RELA,RRAS
Role of NFAT in Regulation of the Immune Response	2.01	2.01	3.873	3.873	Calm1 (includes others),GNAI2,GNAS,GNB1,GNB2,GNG5,HLA-A,HLA-DMB,HLA-DQA1,HLA-DQB1,HLA-DRB5,HRAS,NFKBIA,NFKBIB,ORAI1,PPP3CA,RALA,RAP1A,RAP1B,RELA,RRAS
CREB Signaling in Neurons	1.93	1.93	3.742	3.742	Calm1 (includes others),CAMK2D,CREB3,GNAI2,GNAS,GNB1,GNB2,GNG5,GTF2B,HRAS,PDIA3,POLR2C,POLR2F,POLR2G,POLR2J,POLR2L,PRKAR1A,PRKAR2A,PRKCI,RALA,RAP1A,RAP1B,RRAS
Insulin Secretion Signaling Pathway	1.91	1.91	5.099	5.099	CAMK2D,CREB3,EIF2S1,EIF2S2,EIF4A1,EIF4A3,EIF4E,EIF4G2,GNAS,MAPK13,NAPA,PABPC1,PDIA3,PRKAR1A,PRKAR2A,PRKCI,RAP1A,RAP1B,SCNN1A,SEC11A,SPCS1,SRP14,SRP54,SRP72,SSR2,SSR4
Ceramide Signaling	1.85	1.85	3.464	3.464	CTSD,CYCS,DIABLO,HRAS,PPP2CA,PPP2CB,PPP2R1A,RALA,RAP1A,RAP1B,RELA,RRAS
Opioid Signaling Pathway	1.83	1.83	3.266	3.266	AP2M1,AP2S1,Calm1 (includes others),CAMK2D,CLTA,CLTB,CREB3,CTNNB1,FOSB,GNAI2,GNAS,GNB1,GNG5,HRAS,MAP2K3,NFKBIA,OGFR,PPP3CA,PRKAR1A,PRKAR2A,PRKCI,RAC1,RALA,RAP1A,RAP1B,RRAS
G Beta Gamma Signaling	1.79	1.79	3.742	3.742	CAV2,GNAI2,GNAS,GNB1,GNB2,GNG5,HBEGF,HRAS,PRKAR1A,PRKAR2A,PRKCI,RALA,RAP1A,RAP1B,RRAS
IL-1 Signaling	1.74	1.74	2.828	2.828	GNAI2,GNAS,GNB1,GNB2,GNG5,MAP2K3,MAPK13,NFKBIA,NFKBIB,PRKAR1A,PRKAR2A,RELA
P2Y Purigenic Receptor Signaling Pathway	1.64	1.64	3.207	3.207	CREB3,GNAI2,GNB1,GNB2,GNG5,HRAS,PDIA3,PRKAR1A,PRKAR2A,PRKCI,RALA,RAP1A,RAP1B,RELA,RRAS
B Cell Receptor Signaling	1.63	1.63	4.025	4.025	BCL10,BCL2L1,Calm1 (includes others),CAMK2D,CFL1,CFL2,CREB3,EGR1,HRAS,MAP2K3,MAPK13,NFKBIA,NFKBIB,PPP3CA,RAC1,RALA,RAP1A,RAP1B,RELA,RRAS
Natural Killer Cell Signaling	1.63	1.63	2.4	2.4	B2M,CFL1,CFL2,HLA-A,HLA-E,HRAS,HSPA1A/HSPA1B,HSPA4,HSPA8,IL18R1,ITGB1,MAP2K3,MAPK13,NECTIN2,RAC1,RALA,RAP1A,RAP1B,RELA,ROCK1,RRAS
HMGB1 Signaling	1.55	1.55	4	4	AGER,Cdc42,HRAS,ICAM1,IFNGR2,IL33,MAP2K3,MAPK13,RAC1,RALA,RAP1A,RAP1B,RBBP7,RELA,RHOA,RHOC,RHOD,RRAS
Cholecystokinin/Gastrin-mediated Signaling	1.55	1.55	2.887	2.887	Cdc42,HRAS,IL33,MAP2K3,PRKCI,RAC1,RALA,RAP1A,RAP1B,RHOA,RHOC,RHOD,ROCK1,RRAS
Xenobiotic Metabolism General Signaling Pathway	1.52	1.52	4	4	FTL,GCLC,GSTA3,GSTM5,GSTP1,HRAS,MAP2K3,MAPK13,MGST1,MGST3,NFE2L2,PRKCI,RALA,RAP1A,RAP1B,RRAS
PKCθ Signaling in T Lymphocytes	1.51	1.51	4.123	4.123	BCL10,CAMK2D,HLA-A,HLA-DMB,HLA-DQA1,HLA-DQB1,HLA-DRB5,HRAS,NFKBIA,NFKBIB,PPP3CA,RAC1,RALA,RAP1A,RAP1B,RELA,RRAS
Ingenuity Canonical Pathways		-log(p-value)		z-score	Molecules
Cholesterol Biosynthesis I	2.96	2.96		-1.342	CYP51A1,DHCR24,EBP,MSMO1,NSDHL
Cholesterol Biosynthesis II (via 24,25-dihydrolanosterol)	2.96	2.96		-1.342	CYP51A1,DHCR24,EBP,MSMO1,NSDHL
Cholesterol Biosynthesis III (via Desmosterol)	2.96	2.96		-1.342	CYP51A1,DHCR24,EBP,MSMO1,NSDHL
Superpathway of Cholesterol Biosynthesis	5.88	5.88		-2.714	ACAT2,CYP51A1,DHCR24,EBP,FDPS,HMGCR,HMGCS1,IDI1,MSMO1,NSDHL,PMVK
Mevalonate Pathway I	2.8	2.8		-2.236	ACAT2,HMGCR,HMGCS1,IDI1,PMVK
Superpathway of Geranylgeranyldiphosphate Biosynthesis I (via Mevalonate)	3.09	3.09		-2.449	ACAT2,FDPS,HMGCR,HMGCS1,IDI1,PMVK
Oleate Biosynthesis II (Animals)	2.06	2.06		-1	CYB5A,FADS1,SCD,Scd2
HIPPO signaling	6.88	6.88		-1.941	CD44,PPP1CA,PPP1CB,Ppp1cc,PPP1R11,PPP1R12A,PPP1R14B,PPP1R14C,PPP2CA,PPP2CB,PPP2R1A,RASSF1,SFN,SKP1,TJP2,WWTR1,YWHAB,YWHAE,YWHAH,YWHAQ,YWHAZ
Coronavirus Pathogenesis Pathway	6.7	6.7		-3.024	BAX,CCND1,CDK4,EEF1A1,EIF4E,MAPK13,NFKBIA,NFKBIB,NPM1,PA2G4,RELA,RPS10,RPS11,RPS13,RPS16,RPS17,RPS18,RPS19,RPS2,RPS20,RPS26,RPS27L,RPS28,RPS3,RPS4Y1,RPS5,RPS6,RPS7,RPSA
RhoGDI Signaling	6.96	6.96		-3.78	ACTB,ACTG1,ACTR2,ARHGDIA,ARPC1B,ARPC2,ARPC3,ARPC4,ARPC5,ARPC5L,CD44,Cdc42,CFL1,CFL2,EZR,GNAI2,GNAS,GNB1,GNB2,GNG5,ITGA3,ITGB1,MSN,MYL12A,MYL12B,MYL6,PPP1R12A,RAC1,RHOA,RHOC,RHOD,ROCK1,WASF2
LXR/RXR Activation	3.82	3.82		-1.155	ACACA,APOE,C3,CD14,CLU,CYP51A1,ECHS1,FASN,HMGCR,IL33,ITIH4,LBP,LDLR,LPL,LYZ,PON1,RELA,SCD,SREBF1,TF
Semaphorin Neuronal Repulsive Signaling Pathway	3.39	3.39		-1.342	CD44,CFL1,CFL2,DPYSL2,ITGA3,ITGB1,MAP2K3,MPRIP,MYL12A,MYL12B,MYL6,NRP1,PPP1CB,PPP1R12A,PRKAR1A,PRKAR2A,RAC1,RHOA,ROCK1,RRAS
PPAR Signaling	2.83	2.83		-2	CITED2,HRAS,HSP90AA1,HSP90AB1,IL33,NFKBIA,NFKBIB,PDGFA,RALA,RAP1A,RAP1B,RELA,RRAS,SCAND1,SNW1,SRA1
VDR/RXR Activation	1.84	1.84		-0.816	CD14,CDKN1A,CEBPA,CEBPB,GADD45A,GTF2B,HES1,PDGFA,PRKCI,PSMC5,S100G
BEX2 Signaling Pathway	1.8	1.8		-0.905	BEX1,CCND1,CDKN1A,CTNNB1,HIF1A,NFKBIA,PPP2CA,PPP2CB,PPP2R1A,RELA,VEGFA
PTEN Signaling	2.35	2.35		-3.153	BCL2L1,CCND1,CDKN1A,CSNK2B,FGFR2,HRAS,ILK,ITGA3,ITGB1,MAGI3,RAC1,RALA,RAP1A,RAP1B,RELA,RRAS,YWHAH
Cardiac β-adrenergic Signaling	2.21	2.21		-1.387	AKAP13,AKAP7,GNAS,GNB1,GNB2,GNG5,PPP1CA,PPP1CB,Ppp1cc,PPP1R11,PPP1R12A,PPP1R14B,PPP1R14C,PPP2CA,PPP2CB,PPP2R1A,PRKAR1A,PRKAR2A
Endocannabinoid Cancer Inhibition Pathway	1.52	1.52		-1.5	ATF3,CCND1,CCND2,CCND3,CDKN1A,CREB3,CTNNB1,GNAI2,HIF1A,MAP2K3,NUPR1,PRKAR1A,PRKAR2A,RHOA,ROCK1,VEGFA

## Sheet: Sheet1
Supplementary File 1a
Pathways	log(p-value)	z-score
Oxidative Phosphorylation	46	5.5
Mitochondrial Dysfunction	44
EIF2 Signaling	34	5.754
Regulation of eIF4 and p70S6K Signaling	20.6	1.508
mTOR Signaling	16.1	2.828
NRF2-mediated Oxidative Stress Response	16.1	4.802
Unfolded protein response	5.57	1.508
p53 Signaling	5.19	1.265
Apoptosis Signaling	4.57	0.688
Interferon Signaling	3.32	2.333
Supplementary File 1b
Pathways	log(p-value)	z-score
EIF2 Signaling	48.3	6.14
Mitochondrial Dysfunction	27.4
Oxidative Phosphorylation	26.7	5
Regulation of eIF4 and p70S6K Signaling	26.7	2.4
mTOR Signaling	21.9	3.244
NRF2-mediated Oxidative Stress Response	17	5.397
Unfolded protein response	11.5	2.2
Apoptosis Signaling	7.65	0.507
Senescence Pathway	6.5	4.765
p53 Signaling	6.18	2.236
